1 **Male sex chromosomal complement exacerbates the pathogenicity of Th17 cells in a chronic model of**  
2 **CNS autoimmunity.**

3  
4 Prenitha Mercy Ignatius Arokia Doss<sup>1</sup>, Joanie Baillargeon<sup>1</sup>, Asmita Pradeep Yeola<sup>1</sup>, John B. Williams<sup>2</sup>, Mickael  
5 Leclercq<sup>1</sup>, Charles Joly-Beauparlant<sup>1</sup>, Melanie Alpaugh<sup>1</sup>, Ana C. Anderson<sup>3</sup>, Arnaud Droit<sup>1,4</sup>, Hans Lassmann<sup>5</sup>,  
6 Craig S. Moore<sup>2,6</sup>, Manu Rangachari<sup>1,4,7</sup>.

7  
8 <sup>1</sup> Department of Neurosciences, Centre de recherche du CHU de Québec – Université Laval, Pavillon CHUL,  
9 2705 boul Laurier, Quebec City, QC, CANADA G1V 4G2; <sup>2</sup>Division of BioMedical Sciences, Faculty of  
0 Medicine, Memorial University of Newfoundland, St. John’s, NL, CANADA; <sup>3</sup> Evergrande Center for  
1 Immunologic Diseases and Ann Romney Center for Neurologic Diseases, Harvard Medical School and  
2 Brigham & Women’s Hospital, 60 Fenwood Rd, Boston MA USA 02115; <sup>4</sup> Department of Molecular Medicine,  
3 Faculty of Medicine, Laval University, 1050 ave de la Médecine, Quebec City, CANADA; <sup>5</sup> Division of  
4 Neuroimmunology, Center for Brain Research, Medical University of Vienna, Spitalgasse 4, Vienna AUSTRIA  
5 1090; <sup>6</sup> Department of Neurology, Faculty of Medicine, Memorial University of Newfoundland, St. John’s, NL,  
6 CANADA; <sup>7</sup> Corresponding author.

7  
8 Contact information for corresponding author:

9 Manu Rangachari, Ph.D.

0 Department of Neurosciences

1 Centre de recherche du CHU de Québec – Université Laval

2 Pavillon CHUL, T2-47

3 2705 boul Laurier, Québec, QC CANADA G1V 4G2

4 [Manu.rangachari@crchudequebec.ulaval.ca](mailto:Manu.rangachari@crchudequebec.ulaval.ca)

5 Tel: +1-418-525-4444 x 46461

6

## 1 **Summary**

2 Sex differences in the incidence and severity of multiple sclerosis (MS) have long been recognized. However,  
3 the underlying cellular and molecular mechanisms for why male sex is associated with more aggressive and  
4 debilitating disease remain poorly defined. Using an T cell adoptive transfer model of chronic EAE, we find  
5 that male Th17 cells induced disease of increased severity relative to female Th17 cells, irrespective of whether  
6 transferred to male or female recipients. Throughout the disease course, a greater frequency of male Th17 cells  
7 produced the heterodox cytokine IFN $\gamma$ , a hallmark of pathogenic Th17 responses. Intriguingly, sex  
8 chromosomal complement, and not hormones, were responsible for the increased pathogenicity of male Th17  
9 cells and an X-linked immune regulator, *Jarid1c*, was downregulated in both pathogenic male Th17 and CD4<sup>+</sup>  
0 T cells from men with MS. Together, our data indicate that male sex critical regulates Th17 cell plasticity and  
1 pathogenicity via sex chromosomal complement.

2

## 3 **Keywords**

4 Multiple sclerosis, progressive multiple sclerosis, experimental autoimmune encephalomyelitis, CD4<sup>+</sup> T cell,  
5 Th17, IFN $\gamma$ , IL-17, Four Core Genotypes, sex hormones, sex chromosome complement.

6

7

## 1 **Introduction**

2

3 Multiple sclerosis (MS) is a chronic inflammatory disease in which T cells breach the blood-brain barrier and  
4 mount an attack against central nervous system (CNS) myelin. MS, which affects more than 2 million people  
5 world-wide (Browne et al., 2014), presents two broad clinical courses: relapsing/remitting (RR) or progressive.  
6 A number of immunomodulatory therapies are now available for RR disease, which is seen in approximately  
7 80% of patients from onset (Scalfari et al., 2013). However, 30-60% of MS patients will ultimately transition to  
8 a secondary progressive (SP) form of the disease for which current drugs are largely ineffective (Larochelle et  
9 al., 2016).

0 The role of biological sex as a determinant of MS incidence is well established, as women develop the  
1 disease at 2-3 times the frequency of men (Greer and McCombe, 2011; Sloka et al., 2011). However, what is  
2 less well understood is why MS in men tends to progress more rapidly and aggressively (Beatty and Aupperle,  
3 2002; Menon et al., 2013; Tremlett et al., 2006). In parallel, it is increasingly more appreciated that T helper 17  
4 (Th17) CD4<sup>+</sup> T cell responses may be drivers of progressive MS (Huber et al., 2014; Romme Christensen et al.,  
5 2013), though the mechanisms remain unclear. Together, these clinical findings illustrate the uncoupling of  
6 disease incidence and severity in MS, and underscore the need for deciphering the cellular and molecular  
7 mechanisms underlying the role of biological sex in determining disease course in MS.

8 Experimental autoimmune encephalomyelitis (EAE) is a mouse model that recapitulates key immune  
9 aspects of MS. It can be induced by active immunization by encephalitogenic myelin-derived peptides, as well  
0 by the adoptive transfer of primed myelin-reactive T cells, with the latter approach permitting one to isolate the  
1 role of T cells, and specific effector T cell subsets, in disease processes (Jäger et al., 2009; Rangachari et al.,  
2 2012). The popular C57BL6/J model of EAE displays either an acute monophasic or stably chronic disease  
3 course (Berard et al., 2010), while EAE in SJL/J mice shows a RR pattern (McRae et al., 1995). By contrast,  
4 numerous groups have shown that active immunization of non-obese diabetic (NOD) strain mice with myelin  
5 oligodendrocyte glycoprotein (MOG)<sub>[35-55]</sub> induces a RR disease course followed by transition to chronic

1 disease. Accordingly, the NOD-EAE active immunization model has been used to probe potential mechanisms  
2 driving progressive disease (Farez et al., 2009; Mayo et al., 2014).

3 In this study, we used a T cell receptor (TcR) transgenic (Tg) model (1C6), that recognizes MOG<sub>[35-55]</sub>  
4 on the NOD background (Anderson et al., 2012), to examine the role of biological sex in determining Th17  
5 phenotype and disease course upon adoptive transfer into NOD.*Scid* mice. We observed a striking sex bias, as  
6 recipients of male 1C6 Th17 cells developed disease of greater severity than recipients of female Th17 cells,  
7 characterized by a higher frequency of progressive disease. This sex dimorphism was T cell-intrinsic, as male  
8 Th17 cells induced severe disease irrespective of whether they were transferred to male or female recipients.  
9 Male Th17 cells displayed a strong tendency towards production of interferon (IFN)- $\gamma$  upon adoptive transfer,  
0 and they developed an “ex-Th17” transcriptional signature that is associated with Th17 cell pathogenicity.  
1 Notably, male Th17 pathogenicity was driven by male sex chromosomal complement rather than by androgens;  
2 we identified an X-linked immunomodulatory gene, *Jarid1c*, which escapes second-copy silencing in female  
3 immune cells and is downregulated in both male 1C6 Th17 cells that transfer severe EAE. Interestingly, the  
4 downregulation of *Jarid1c* was also observed in CD4<sup>+</sup> T cells taken from male patients with MS. We thus  
5 uncover a molecular and cellular basis for the association of male sex with exacerbated disease course in CNS  
6 autoimmunity.

## 8 **Results**

### 0 *Male 1C6 Th17 cells induce severe and frequently lethal progressive EAE*

1 Multiple lines of evidence indicate a role for dysregulated Th17 responses in progressive MS. CD4<sup>+</sup>IL-23R<sup>+</sup>  
2 Th17 cells are increased in the peripheral blood of SPMS and primary progressive (PP) MS, but not RRMS,  
3 patients (Romme Christensen et al., 2013). Further, circulating levels of Th17-inducible chemokines are higher  
4 in SPMS as compared to RRMS (Huber et al., 2014). However, while MS progresses more rapidly in men, the  
5 potential contribution of biological sex to Th17-driven relapsing/remitting and chronic progressive CNS  
6 autoimmune inflammation has not been extensively studied.



1 To examine this, we developed an adoptive transfer protocol in which we first purified splenic and  
2 lymph node CD4<sup>+</sup>CD62L<sup>hi</sup> cells from female or male 1C6 mice and stimulated them for 5 days with agonistic  
3 antibodies to CD3 and CD28 under established pathogenic Th17 differentiation conditions (Bettelli et al., 2006)  
4 (Figure 1A). By using an antibody stimulation approach, rather than stimulation via peptide and antigen-  
5 presenting cells, we were able to isolate the contributions of T cells alone to disease processes. After 5 days of  
6 *in vitro* culture, both female and male Th17 cells were highly positive for the Th17 master transcription factor  
7 ROR $\gamma$ t (Figure 1B), indicating that they were committed to the Th17 lineage prior to *in vivo* transfer. We then  
8 adoptively transferred 1C6 Th17 cells to sex-matched NOD.*Scid* recipient mice and monitored them for signs of  
9 clinical disease over the course of 70 days. Use of NOD.*Scid* mice as hosts carried several distinct advantages.  
0 First, NOD.*Scid* are resistant to the development of spontaneous diabetes that is characteristic of the NOD strain  
1 (Bobbala et al., 2012; Christianson et al., 1993; Rohane et al., 1995) and thus we could exclude insulinitis and  
2 beta-cell destruction as confounding factors that could affect the course of EAE. Further, the lack of  
3 endogenous T cells in NOD.*Scid* mice allowed us to conduct sex-mismatched transfers without fear of host-  
4 versus-graft reactivity.

5 Strikingly, adoptive transfer of male 1C6 Th17 cells to male NOD.*Scid* induced EAE of much greater  
6 severity overall than that seen when female 1C6 Th17 were transferred to female NOD.*Scid* (Table 1). More  
7 than two-thirds of male Th17 recipients (M<sup>rapid</sup>) developed a chronically worsening disease course and rapidly  
8 attained ethical endpoints (33.7 d  $\pm$  2.5). The remaining males developed a non-lethal course (M<sup>d70</sup>) that did not  
9 differ in severity from female (F) Th17 recipients (Figure 1C, Table 1). All female Th17 recipients survived to  
0 d70. These data gave the first indication that male Th17 cells have a greater intrinsic pathogenic capacity.

1 Irrespective of sex, more than half of all Th17 recipients (35/63) developed chronically worsening  
2 disease, while close to a third (19/63) displayed at least one relapse/remission cycle followed by chronic  
3 worsening of symptoms. Thus, a substantial frequency of 1C6 Th17 recipients recapitulated the biphasic disease  
4 course that is observed in actively immunized NOD animals. Further, as NOD.*Scid* mice do not develop  
5 diabetes, this also indicated that biphasic disease could develop independently of the insulinitis and beta cell  
6 destruction that characterizes the NOD strain.

1 We next examined classical parameters of CNS damage to see whether they might help explain the  
2 increased severity of disease seen in the majority of male Th17 recipients. We observed a significant increase in  
3 leukocytic infiltration of the spinal cord at disease onset in males relative to females (Figure 1D), but no  
4 differences in area of demyelination. We observed no differences between male and female recipients at  
5 endpoint with respect to either inflammatory infiltration or demyelination in the spinal cord (Figure 1E), despite  
6 the fact that all the males analyzed had a rapid disease course; this was in line with previous findings that  
7 histopathological markers of CNS damage may be insensitive correlates of EAE severity (Goncalves DaSilva et  
8 al., 2010).

9 When NOD.*Scid* mice were reconstituted with naive 1C6 CD4<sup>+</sup> T cells and then actively immunized, a  
0 significant frequency developed optic neuritis (Anderson et al., 2012). We therefore examined the effect of sex  
1 on the induction of optic neuritis. Strikingly, male Th17 mice displayed leukocytic inflammation, demyelination  
2 and axon degeneration in the optic nerve at disease onset, while female recipients showed no signs of  
3 histological damage (Figure 1F). In endstage disease, optic nerve damage was observed in all mice regardless of  
4 sex. Thus, male sex accelerates optic nerve damage, similar to its effects on paralytic disease course.

5 Actively immunized NOD mice display inflammatory lesions in both the cerebellum and midbrain  
6 (Dang et al., 2015). We next examined whether adoptive transfer of 1C6 Th17 could cause lesion formation in  
7 the brain as well as the spinal cord. Meningeal inflammation was observed in the brains of 100% of female (4/4)  
8 and male (5/5) recipients at onset, and in 75% of female (6/8) and 50% of male (3/6) mice at endpoint. We saw  
9 widespread evidence of brain parenchymal inflammation at onset (female, 100%, 4/4; male, 100% 5/5) and  
0 endpoint (female, 75%, 6/8; male, 83%, 5/6). Inflammatory lesions (Figure 1G) were frequently observed in the  
1 cerebellum, medulla, mesencephalon and cerebellum, and less frequently in the thalamus. Demyelinated lesions  
2 were never seen at onset, but were observed in the medullae of 2/8 females and 3/6 males at endpoint (Fig 1H).  
3 In sum, our data thus far showed that adoptive transfer of male 1C6 Th17 to male recipients could induce  
4 chronic EAE of greater severity than that observed in female recipients of female Th17. Further, disease in  
5 males was characterized by increased spinal cord inflammation and optic nerve damage are exacerbated at  
6 onset.

1

2 *Transferred 1C6 Th17 cells display phenotypic plasticity at early disease timepoints.*

3 We next addressed whether the severe disease seen in male Th17 recipients resulted from augmented  
4 pathogenicity of male Th17 cells themselves, or if it was caused by T cell-extrinsic factors such as increased  
5 sensitivity of the male CNS to inflammatory insult. In fact, recent studies indicated that increased susceptibility  
6 of male SJL mice to EAE is the result of increased neurodegeneration in the male CNS (Du et al., 2014). To  
7 address this question, we generated and adoptively transferred either male or female 1C6 Th17 cells to sex-  
8 matched or –mismatched recipients. Here, we exploited the fact that NOD.*Scid* do not have endogenous T cells  
9 and therefore would not reject sex-mismatched donor cells. Male 1C6 Th17 cells transferred far more severe  
0 disease relative to female Th17 cells, irrespective of whether transferred to female (Figure 2A) or male (Figure  
1 2B) recipient NOD.*Scid* mice. Taken together, our data showed that male sex is a key cell intrinsic determinant  
2 of the severity of disease induced by Th17 cells.

3 We next sought to understand why male Th17 cells could induce EAE of increased severity. Production  
4 of the signature cytokine IL-17A does not, on its own, necessarily dictate whether a Th17 cell is pathogenic (Y.  
5 Lee et al., 2012), and the IL-17<sup>+</sup> Th17 phenotype is highly unstable (Hirota et al., 2011; Kurschus et al., 2010).  
6 Further, Th17 cells readily express the Th1 signature cytokine IFN $\gamma$  *in vivo* (Gaublomme et al., 2015; Zhu et al.,  
7 2010), and these IFN $\gamma$ <sup>+</sup> Th17 cells have been implicated in the pathogenesis of EAE (Abromson-Leeman et al.,  
8 2009; Carbajal et al., 2015; Suryani and Sutton, 2007). It was therefore possible that an increase in phenotypic  
9 plasticity could explain the augmented pathogenicity of male Th17 cells.

0 To address this, we first isolated male versus female 1C6 Th17 cells from sex-matched NOD.*Scid*  
1 recipients at disease onset and measured their co-production of IFN $\gamma$  and IL-17. Surprisingly, we detected few  
2 *bonafide* IL-17<sup>+</sup>IFN $\gamma$ <sup>-</sup> CD4<sup>+</sup>T cells of either sex; the vast majority of T cells either co-produced IL-17 and IFN $\gamma$ ,  
3 or they produced IFN $\gamma$  alone (Fig 2C). Notably, while production of IL-17 did not differ between male and  
4 female Th17 cells, a significantly greater proportion of male Th17 cells produced IFN $\gamma$  (Fig 2C). At the first  
5 relapse, IL-17 production was almost completely absent from both female and male cells in the spleen,  
6 indicating that production of this cytokine from T cells was not essential to pathology after the earliest stage of

1 visible disease. Nevertheless, the percentage of IFN $\gamma$ -producing male splenic cells was again significantly  
2 higher than that observed of females at relapse (Fig 2D). Thus, despite being committed to the Th17 lineage  
3 prior to adoptive transfer (Fig 1B), transferred Th17 cells, and male Th17 cells in particular rapidly exhibited  
4 phenotypic plasticity in the *in vivo* setting.

5 To examine whether sex-specific differences could be observed in the target organ, we next measured  
6 cytokine production of T cells entering the CNS at onset and relapse. At both timepoints, the vast majority of T  
7 cells, both male and female, produced no IL-17 and rather displayed an IL-17<sup>-</sup>IFN $\gamma$ <sup>+</sup> phenotype (Figure 2E),  
8 indicating the superior capacity of these cells to enter the target organ. However, there were no significant  
9 differences between the proportions of either IL-17<sup>-</sup>IFN $\gamma$ <sup>+</sup> or total IFN $\gamma$ <sup>+</sup> between the sexes at these timepoints.

0 Granulocyte and macrophage colony-stimulating factor (GM-CSF) is a crucial positive regulator of  
1 Th17 cell pathogenicity in both MS and EAE (Becher et al., 2016). As we had observed phenotypic plasticity in  
2 male Th17 cells in early disease, we next sought to determine whether male cells produced more of this  
3 cytokine. However, no differences in GM-CSF expression between male and female Th17 cells were seen at  
4 disease onset or relapse or in either splenic (Supplemental Figure 1A) or CNS (Supplemental Figure 1B) T  
5 cells. Similarly, few differences were observed between male and female with respect to TNF $\alpha$  and IL-2  
6 production, though a higher percentage of male splenic Th17 produced TNF $\alpha$  at relapse (Supplemental Figure  
7 1A). We could also rule out an increased conversion of female Th17 to FoxP3<sup>+</sup> T<sub>reg</sub>, as no differences in the  
8 frequency of these cells was observed between males and females (Supplemental Figure 1C).

9  
0 *Phenotypic plasticity of male Th17 cells underlies a rapid disease course.*

1 Our data thus showed important differences between transferred male versus female T cells during early  
2 disease timepoints. A substantially greater proportion of splenic male Th17 produced the heterodox cytokine  
3 IFN $\gamma$  as compared to females. This indicated that male Th17 more rapidly adopted a plastic phenotype *in vivo*.  
4 However, in the CNS, no differences in IFN $\gamma$  production were observed between recipients of male or female  
5 cells at these timepoints, reflecting the similar kinetics of symptom onset between the two groups. By contrast,  
6 we had observed a sex dimorphism at disease endpoint. Mice receiving female 1C6 Th17 universally survived

1 to d70 with disease of moderately severe maximal severity (score  $2.6 \pm 0.2$ ; Table 1), while there were two  
2 possible fates for mice that received male Th17: the majority rapidly attained ethical endpoints ( $M^{\text{rapid}}$ ), while a  
3 minority survived to d70 ( $M^{\text{d70}}$ ) and had disease of comparable severity to those receiving female (F) Th17  
4 (Figure 1C).

5 We thus examined whether increased Th17 phenotypic plasticity might explain these divergent  
6 outcomes, by comparing IL-17 and IFN $\gamma$  production from T cells isolated from F Th17,  $M^{\text{rapid}}$  and  $M^{\text{d70}}$   
7 recipients. In all conditions, as predicted our findings at relapse, the majority of cytokine-producing T cells in  
8 both spleen and CNS were IL-17<sup>+</sup>IFN $\gamma$ <sup>+</sup>. The percentage of splenic Th17 making IFN $\gamma$  was increased from  
9  $M^{\text{rapid}}$  mice relative to those from female and  $M^{\text{d70}}$  (Figure 3A). By contrast, no differences in IL-17 production  
0 were observed. Crucially, we saw a large increase in the frequency of IFN $\gamma$ <sup>+</sup> T cells in the CNS of  $M^{\text{rapid}}$  mice,  
1 as compared to either F or  $M^{\text{d70}}$  mice (Figure 3B). Further, CNS-infiltrating Th17 from  $M^{\text{rapid}}$  made over 12-fold  
2 more IFN $\gamma$  than either female or  $M^{\text{d70}}$  cells as measured by mean fluorescence intensity (MFI). MFI of GM-  
3 CSF, but not of TNF $\alpha$  or IL-2, was also significantly increased from  $M^{\text{rapid}}$  T cells (Figure 3C). Altogether, our  
4 data showed that male sex is an important regulator of Th17 plasticity, and that Th17 production of IFN $\gamma$  and  
5 GM-CSF correlates strongly with disease severity observed in recipients of male Th17.

### 6 7 *Male Th1 cells do not induce a rapid disease course*

8 We had found that male Th17 cells induced severe EAE and were highly plastic as characterized by  
9 their heightened production of IFN $\gamma$  relative to female Th17 cells. We therefore wanted to ascertain whether a  
0 similar sex dimorphism applies to Th1 cells, which are *bonafide* IFN $\gamma$  producers and are also potent inducers of  
1 EAE in adoptive transfer models (Jäger et al., 2009; Rangachari et al., 2012). We stimulated male and female  
2 naïve 1C6 CD4<sup>+</sup>CD62L<sup>hi</sup> cells with agonistic anti-CD3 and anti-CD28 and under defined Th1 differentiation  
3 conditions (Rangachari et al., 2012). After 5 days of culture, the resulting cells were positive for T-bet (Figure  
4 4A), the master Th1 lineage transcription factor (Szabo et al., 2000). We then transferred these Th1 cells to sex-  
5 matched NOD.*Scid* recipient mice. Linear regression analysis of the disease curves of host mice suggested that  
6 male 1C6 Th1 recipients accumulate symptoms more rapidly than those receiving female Th1 cells (Figure 4B),

1 and maximal disease severity was also higher in mice receiving male Th1 cells (Table 1). Crucially, however,  
2 disease severity of male Th1 recipients was significantly lower than that of male Th17 recipients (Table 1), and  
3 a greatly reduced proportion of male Th1 recipients experienced a rapid disease course in which mice attained  
4 ethical endpoints before 70 days (Table 1). In sum, our data indicated that a sex dimorphism by which male 1C6  
5 Th1 cells worsen the course of EAE relative to female Th1; however, male Th17 cells were required for an  
6 extremely severe, accelerated, progressive disease course.

7  
8 *Male sex interacts with disease duration, but not severity, in augmenting an ex-Th17 signature.*

9 In recent years, there has been intense interest in characterizing diverse Th17 cell fates at the transcriptional  
0 level. In an important advance, single cell RNA-seq analyses revealed that Th17 cells can be classified into  
1 successive transient states, adopting a Th1-like “ex-Th17” transcriptional profile (“pre-Th1-like” →  
2 “Th17/Th1-like” → “Th1-like memory”) as they become pathogenic in C57BL/6J EAE (Gaublomme et al.,  
3 2015). We therefore examined whether signature transcripts from these cellular states were upregulated in male  
4 Th17 cells. We observed that only 2 of 13 targets – *Il18r1* and *Cxcr6* – were upregulated in splenic male Th17  
5 cells at disease onset (Supplementary Figure 2). Thus, male Th17 did not appear to have initiated a transition  
6 towards an ex-Th17 transcriptional profile at the first signs of clinical symptoms, despite a greater frequency of  
7 male Th17 being IFN $\gamma$ <sup>+</sup> at this timepoint.

8 We next examined whether the presence of an ex-Th17 transcriptional profile correlated with  
9 exacerbated disease outcomes. We compared males that developed rapid, fatal disease (M<sup>rapid</sup>) to females that  
0 we sacrificed in parallel (F<sup>early</sup>). In agreement with our previous findings, F<sup>early</sup> mice did not show signs of  
1 severe disease (Figure 5A). We additionally compared males and females that survived to d70 (M<sup>d70</sup> vs F<sup>d70</sup>).  
2 As expected, M<sup>d70</sup> had disease of comparable severity to F<sup>d70</sup> (Figure 5B). We then assessed expression of  
3 candidate pre-Th1-like (Figure 5C), Th17/Th1-like (Figure 5D) and Th1-like memory (Figure 5E) transcripts  
4 from splenic CD4<sup>+</sup> T cells by qPCR. Of the 13 signature transcripts studied, 5 were upregulated in M<sup>rapid</sup> Th17  
5 cells relative to F<sup>early</sup> Th17. Notably, these transcripts included the cell surface receptors *Il18r1* and *Ccr2*  
6 (Figure 5C), and *Ifngr1* and *Il2rb* (Figure 5E). To our surprise, M<sup>d70</sup> Th17 showed strong induction of each

1 stage of the ex-Th17 gene program, despite the fact that these cells transferred EAE of a moderate, non-rapid  
2 disease course: eleven transcripts were upregulated in M<sup>d70</sup> Th17 relative to F<sup>d70</sup> Th17, with *Il2ra* and *Samsn1*  
3 being the sole exceptions. Furthermore, 8 transcripts (*Mina*, *Fas*, *Ccr2*, *Tnfsf11*, *Ifngr1*, *Nr4a1*, *Tigit*, *Il1r2*,  
4 *Il2ra*, *Samsn1*) were upregulated in M<sup>d70</sup> Th17 as compared to M<sup>rapid</sup> that induced severe disease – in some  
5 cases dramatically (Figures 5C-E). Only 3 of these 8 transcripts (*Ifngr1*, *Il2ra*, *Samsn1*) were similarly  
6 upregulated in F<sup>d70</sup> versus F<sup>early</sup>, indicating that the correlation between disease duration and pathogenic gene  
7 upregulation was principally driven by male sex. Thus, while male sex augments an ex-Th17 gene signature in  
8 1C6 Th17 cells, it does so in relation to disease duration and not to disease severity. Further, the increased  
9 production of IFN $\gamma$  by male Th17 cells that induced rapid, severe, EAE could be uncoupled from the ex-Th17  
0 transcriptional signature.

## 1 2 *Inflammasome inhibition modulates the severity of male Th17-induced disease*

3 We next wanted to identify molecules and/or pathways that could be targeted so as to attenuate the severity of  
4 disease in male Th17 cell recipients. We noted that the pre-Th1-like signature transcript *Il18r1* was upregulated  
5 by more than 2-fold in M<sup>rapid</sup> Th17 as compared to F<sup>early</sup> (Figure 5C), and thus might be a possible target. IL-  
6 18/IL-18R signaling lies downstream of caspase-1-dependent inflammasome activation, and it was recently  
7 shown that the caspase-1 inhibitor VX-765 reduced both inflammasome activation and IL-18 secretion, and  
8 improved behavioral outcomes, in the acute C57BL/6J model of EAE (McKenzie et al., 2018). We therefore  
9 asked whether inhibiting inflammasome activation *in vivo* could modulate the severe disease induced by male  
0 Th17. We transferred male Th17 to male recipients and began treating the mice with VX-765 or vehicle daily  
1 once they reached a clinical score of 2 (impaired righting reflex). VX-765 significantly ameliorated the  
2 accumulation of disease symptoms in recipient mice with established EAE (Figure 5F), indicating that  
3 activation of the inflammasome activity is important for the development of severe disease induced by male  
4 1C6 Th17.

## 6 *Chromosome complement exacerbates NOD-EAE in males*



1 Sex hormones can have profound effects on the pathogenesis of EAE (Dunn et al., 2015). It was therefore  
2 possible that androgens were responsible for the severe EAE induced by male Th17. We generated Th17 cells  
3 from male 1C6 mice that had been castrated (Th17 M<sup>cast</sup>) or sham-operated (Th17 M<sup>sham</sup>), and adoptively  
4 transferred them to male NOD.Scid mice. Interestingly, we observed that transfer of Th17<sup>cast</sup> did not reduce  
5 disease severity (Figure 6A), indicating that T cell-intrinsic androgens were not pathogenic. We next tested the  
6 pathogenicity of Th17 from female 1C6 that had been ovariectomized (Th17 F<sup>ovx</sup>) or sham-operated (Th17  
7 F<sup>sham</sup>), and found that removal of female sex hormones did not worsen EAE in female transfer recipients (Figure  
8 6B). These data showed that differences in pathogenicity between male and female Th17 were not due to sex  
9 hormones.

0 Sex chromosome complement (XX vs XY) can also play an important role in regulating immune  
1 responses (Rubtsov et al., 2010). To assess the role of chromosome complement in the presence of androgen,  
2 we exploited the Four Core Genotype (FCG) model (Arnold and Chen, 2009), in which the testes-determining  
3 gene *Sry* is knocked out of the Y chromosome (Y<sup>SryKO</sup>), but is knocked in to an autosomal chromosome (Tg-  
4 *Sry*). We generated F1 NOD x C57BL/6J (B6) Tg-*Sry* XY<sup>SryKO</sup> mice, which produce androgens and are  
5 chromosomally male, as well as Tg-*Sry* XX mice, which produce androgens yet are chromosomally female. We  
6 then actively immunized these mice with MOG<sub>[35-55]</sub> and observed their development of EAE, exploiting the  
7 prior observation that NOD x B6 F1 mice phenocopy NOD-EAE upon immunization with this encephalitogenic  
8 epitope. (Mayo et al., 2014; 2016). We found that Tg-*Sry* XY<sup>SryKO</sup> mice developed disease of dramatically  
9 greater severity than Tg-*Sry* XX (Figure 6C). Intriguingly, a substantial frequency of CNS-infiltrating CD4<sup>+</sup> T  
0 cells in Tg-*Sry* XY<sup>SryKO</sup> mice displayed a IL-17<sup>+</sup>IFN $\gamma$ <sup>+</sup> phenotype (Figure 6D), which is reflective of Th17  
1 plasticity (Carbajal et al., 2015; Hirota et al., 2011) and pathogenicity (Kebir et al., 2009; Suryani and Sutton,  
2 2007) in active immunization models of EAE.

3 To directly ascertain whether male sex complement exacerbated the pathogenicity of Th17 cells  
4 themselves, we crossed FCG mice to the 1C6 females to generate Tg-*Sry* XY<sup>SryKO</sup> and Tg-*Sry* XX B6 x 1C6 F1  
5 mice. We generated Th17 cells from these lines and adoptively transferred them to male NOD.Scid mice. To  
6 mitigate against potential NK cell-mediated host-versus-graft reactivity against B6 antigens (Hummel et al.,



1 2002), we transferred 40% fewer cells ( $2 \times 10^6$ ) to recipient NOD.Scid than in our standard protocol.  
2 Notwithstanding this lowered dose, Tg-Sry XY<sup>Sry<sup>KO</sup></sup> Th17 induced disease of substantially greater severity than  
3 Tg-Sry XX Th17 (Figure 6E). Together, these data demonstrated that the male chromosomal complement (XY),  
4 and not androgens *per se*, are responsible for promoting the plasticity and pathogenicity of Th17 cells.

5

6 *The putative X-linked Th17 repressor Jarid1c is downregulated in highly pathogenic male Th17 and in CD4<sup>+</sup> T*  
7 *cells of men living with MS.*

8

9 Mammalian female cells inactivate one of their two X-chromosomes, thus ensuring equivalent dosage of X-  
0 linked genes between the sexes. However, this process is far from total (Arnold et al., 2016) and numerous  
1 genes on the silenced X chromosome continue to be transcribed in a tissue-specific manner (Berletch et al.,  
2 2015). Thus, differential dosage of X-linked genes may help explain differences in immune function in females  
3 versus males. As our data indicated that male sex chromosome complement exacerbated Th17 pathogenicity  
4 (Figure 6E), we hypothesized that X-linked genes might a) repress Th17 pathogenicity, and b) be  
5 downregulated in male Th17 cells. To study this possibility, we analyzed publicly available RNA-seq datasets  
6 of lymph node and CNS-infiltrating Th17 at the peak of C57BL6/J EAE (Gaublomme et al., 2015). We  
7 considered CNS-infiltrating Th17 cells to be pathogenic, as they had infiltrated the target organ. Conversely,  
8 lymph node Th17 were considered non-pathogenic. We identified a set of transcripts on the X chromosome that  
9 were downregulated by 2-fold or greater in CNS Th17 (Supplementary Table 1) and thus could be inhibitors of  
0 Th17 pathogenicity. We then compared these transcripts to a set of X chromosome genes that were previously  
1 shown to escape second-copy silencing in female mouse spleen (Berletch et al., 2015), thereby identifying three  
2 X-linked transcripts, *Jarid1c*, *Utp14a* and *Pbdc1* (Figure 7A) that might explain differences in pathogenicity  
3 between male and female Th17. Intriguingly, it was recently reported that *Jarid1c* negatively regulates dendritic  
4 cell activation, suggesting that it can suppress immune cell function (Boukhaled et al., 2016).

5 We next asked whether these putative immunomodulatory X-linked candidates were downregulated in  
6 pathogenic male Th17 that induce severe disease. We found that *Jarid1c* was specifically downregulated in

1 CNS-infiltrating Th17 cells from M<sup>rapid</sup> recipients that develop early, severe disease, as compared to CNS-  
2 infiltrating cells from F<sup>early</sup> mice. (Figure 7B). However, there were no differences in *Jarid1c* expression  
3 between Th17 cells from M<sup>d70</sup> and F<sup>d70</sup> that developed mild disease of comparable severity. *Utp14a* was  
4 downregulated in both M<sup>rapid</sup> and M<sup>d70</sup> as compared to timepoint-matched female controls, while *Pbdc1* was  
5 only downregulated in M<sup>d70</sup> (Figure 7B).

6 We next examined whether sex differences could be observed in the expression of X-linked immune  
7 regulators in the context of human MS. We therefore examined expression of *Jarid1c*, *Utp14a* and *Pbdc1* in  
8 purified CD4<sup>+</sup> T cells from age-matched men (51.4 ± 1.5a) and women (52.6 ± 2.2a) living with MS  
9 (Supplementary Table 2). We observed lower *Jarid1c* expression in CD4<sup>+</sup> T cells from men (Figure 7C). No  
0 sex differences were observed in the expression of *Utp14a* and *Pbdc1*. Together, our data showed that male sex  
1 complement can worsen progressive EAE, and that the X-linked immunoregulatory gene *Jarid1c* is  
2 downregulated both in pathogenic tissue-infiltrating male Th17 as well as in CD4<sup>+</sup> T cells from men with MS.

## 3 4 **Discussion**

5 As is the case for many autoimmune diseases, the incidence of RRMS is much (up to 3 times) greater in  
6 women than in men (Orton et al., 2006). Nevertheless, men are more likely to progress to a higher level of MS  
7 disability than women, and male sex is an exacerbating factor for conversion of RR to SP MS (Koch et al.,  
8 2010). As NOD mice develop a chronic progressive form of EAE (Farez et al., 2009; Mayo et al., 2014), we  
9 developed an adoptive transfer model on this background to examine whether male sex could increase the  
0 incidence and severity of progressive disease in a T cell-intrinsic manner.

1 We find that recipients of male 1C6 Th17 develop EAE of greater severity than their female  
2 counterparts, also developing chronically progressive disease at a higher frequency. While the majority of  
3 recipients of male Th17 attain experimental endpoints rapidly, a subset of mice displays disease that is of no  
4 greater severity than that of recipients of female Th17. This is important because it allowed us to identify  
5 factors that drive worsened pathology in our model. Further, our data show that enhanced disease in males is  
6 due to T cell-intrinsic effects, as male 1C6 Th17 cells induce EAE of markedly great severity relative to females

1 regardless of whether they are transferred to male or female hosts. At first glance, this may seem surprising,  
2 given that women display a higher CD4<sup>+</sup> T cell count than men, and that female cells proliferate more robustly  
3 upon antigenic stimulation. On the other hand, multiple lines of evidence in mouse (Jane-wit et al., 2008; Li et  
4 al., 2013; Zhang et al., 2012) and man (Gracey et al., 2016; Yi et al., 2009; Zhang et al., 2012) indicate that  
5 male sex can promote Th17 responses in the context of autoimmunity. Notably, we found that IFN $\gamma$  production  
6 was considerably greater in peripheral male 1C6 Th17 cells at all timepoints studied and crucially, CNS-  
7 infiltrating male Th17 cells were highly positive for IFN $\gamma$  and GM-CSF in mice that develop severe endstage  
8 disease. Thus, we demonstrate, for the first time, a role for male sex in augmenting Th17 phenotypic plasticity,  
9 which is itself an important determinant of disease severity in autoimmunity (Abromson-Leeman et al., 2009;  
0 Carbajal et al., 2015; Y. K. Lee et al., 2009; Suryani and Sutton, 2007). It is worth noting that while female 1C6  
1 Th17 produced less IFN $\gamma$  *in vivo* than their male counterparts, they also turned off IL-17 expression by the first  
2 relapse. This may be characteristic of T cells on the NOD background, as NOD-strain pancreatic Ag-specific  
3 Th17 cells are prone to converting to an IL-17IFN $\gamma$ <sup>+</sup> phenotype upon transfer to NOD.*Scid*, and blocking IFN $\gamma$   
4 could rescue Th17-induced diabetes in this model (Bending et al., 2009; Martin-Orozco et al., 2009).

5 In recent years, increasing attention has been paid to the transcriptional profile of Th17 cells  
6 (Gaublomme et al., 2015; Yosef et al., 2013), with the goal of identifying functional gene modules that dictate  
7 whether or not they become pathogenic in the context of tissue inflammation. We found that ex-Th17  
8 transcriptional markers were increased in adoptive transferred male Th17 cells, supporting the view that male  
9 sex enhances Th17 plasticity. Interestingly, while these markers were initially described as correlating with  
0 increased pathogenicity in the context of EAE (Gaublomme et al., 2015), we found that while some were indeed  
1 upregulated in male Th17 that transferred severe disease, they were more strongly associated with male Th17  
2 that induced relatively milder disease in recipients that survived to d70. A potential explanation for this  
3 discrepancy is that these targets were initially identified using an IL-17-GFP reporter mouse strain in which  
4 Th17 cells were actively generating IL-17 at the time of harvest (Gaublomme et al., 2015). We, on the other  
5 hand, observe that adoptively transferred 1C6 Th17 lose IL-17 expression relatively early on in disease. Thus, it  
6 is possible that this transcriptional signature may correlate with plasticity, but not necessarily pathogenicity, in

1 Th17 cells that have lost IL-17 expression entirely. Importantly, IFN $\gamma$  (Abromson-Leeman et al., 2009; Carbajal  
2 et al., 2015; Hirota et al., 2011; Suryani and Sutton, 2007) and GM-CSF (Becher et al., 2016), which are  
3 functional markers of pathogenic Th17 cells, are strongly upregulated in male Th17 that transfer severe disease,  
4 suggesting that pathogenicity of these cells may be uncoupled from transcriptionally-defined plasticity in our  
5 model. Another important question is why a proportion (~30%) of male Th17 recipients develop only mild  
6 disease. Overall, splenic CD4<sup>+</sup> from male Th17 recipients showed increased IFN $\gamma$  at onset and relapse; it is  
7 possible that differential expression of this cytokine, or of specific plasticity transcripts, at early timepoints  
8 might predict disease outcomes. However, the terminal nature of these analyses makes it challenging to address  
9 this directly. Further studies will be required to address this issue, perhaps using IL-17 fate-mapping mice  
0 (Hirota et al., 2011).

1 The elegant FCG mouse model permits one to separately consider the contributions of sex hormones and  
2 sex chromosomes to biological processes (Arnold and Chen, 2009). This is important because, in contrast to sex  
3 hormones, the role played by sex chromosomes is often less well understood (Palaszynski et al., 2005). In  
4 agreement with previous studies of active immunization EAE (Bebo et al., 1998; Palaszynski et al., 2004;  
5 Trooster et al., 1996), we found that castration of male 1C6 mice did not reduce the pathogenicity of Th17  
6 derived from these animals. Thus, we exploited the FCG model to generate Tg-*Sry* XX and Tg-*Sry* XY<sup>*Sry*KO</sup>  
7 (NOD x B6 F1) 1C6 mice, and found that Tg-*Sry* XY<sup>*Sry*KO</sup> 1C6 Th17 transferred far more severe EAE to  
8 NOD.Scid recipients. Thus, we show for the first time that T-cell-intrinsic, sex chromosome-encoded, factors  
9 regulate sex-specific differences in Th17 cell plasticity and pathogenicity. It must be noted that the contribution  
0 of male sex chromosomes is highly strain-dependent, as the XY complement is actually immunoprotective in  
1 both active immunization and adoptive transfer EAE on the SJL/J strain, while sex chromosome complement  
2 does not affect C57BL6/J EAE (Smith-Bouvier et al., 2008). The interplay of sex chromosomes and hormones  
3 is therefore complex and strain-specific, with different genetic backgrounds revealing distinct pathogenic or  
4 regulatory mechanisms in the pathogenesis of EAE. In the case of the NOD background, sex chromosome  
5 factors may interact genetically with *Idd* disease susceptibility loci (Wicker et al., 1995). In further studies, it  
6 will be instructive to examine the contribution of these loci to worsened Th17-mediated disease in males.

1 In an elegant recent study, it was shown that when transferred to syngeneic SJL/J hosts, splenocytes  
2 from *in vivo*-primed male, MOG-specific, transgenic TCR<sup>1640</sup> mice induced progressive EAE while female cells  
3 transferred RR-EAE (Dhaeze et al., 2019). In contrast to our findings, however, male splenocytes in this model  
4 did not appear to transfer disease of increased maximal severity relative to female cells. While IL-17 and IFN $\gamma$   
5 production were not directly compared between transferred male and female TCR<sup>1640</sup> T cells, it was observed  
6 that the frequency of IL-17<sup>+</sup>IFN $\gamma$ <sup>-</sup> cells diminished in males as disease progressed while the frequency of IL-17<sup>-</sup>  
7 IFN $\gamma$ <sup>+</sup> increased. An important difference between this study and our own was that prior to transfer, Dhaeze and  
8 colleagues stimulated splenocytes with IL-12 as well as IL-23 so as to reactivate both Th1 and Th17 cells. Thus,  
9 it probable that the IL-17IFN $\gamma$ <sup>+</sup> cells that they identified at chronic disease in males comprised a mixture of  
0 both *bonafide* Th1 cells as well as ex-Th17 cells. By contrast, we specifically generated Th17 cells that were  
1 highly Ror $\gamma$ t-positive prior to adoptive transfer, and male 1C6 Th17 generated under these conditions induced  
2 an accelerated disease course of greater severity than that invoked by male Th1. Our data thus uncover a crucial  
3 role for the Th17 compartment specifically in mediating sex differences in the severity of progressive CNS  
4 autoimmunity. Further, we pinpoint a role for sex chromosome factors in regulating this dimorphism.

5 Using publicly available transcriptomics data and a bioinformatics-based approach, we have identified 3  
6 genes on the X chromosome, *Jarid1c*, *Utp14a* and *Pbdc1*, that escape second-copy silencing in the immune  
7 compartment (Berletch et al., 2015) and are additionally downregulated in pathogenic T cells. Further, we find  
8 that expression of one of these genes, *Jarid1c*, is profoundly downregulated in male Th17 cells taken from mice  
9 that experience lethal disease. *Jarid1c* is a histone H3K4 demethylase that promotes gene transcription when  
0 binding to enhancer regions, yet represses transcription when binding to core promoter sequences (Outchkourov  
1 et al., 2013). In a recent advance, it was shown that *Jarid1c* has an immunomodulatory function by enforcing a  
2 state of dendritic cell quiescence in collaboration with the transcriptional repressor *Pcgf6* (Boukhaled et al.,  
3 2016). It will be important in the future to understand whether *Jarid1c* is a broad repressor of leukocyte  
4 activation and whether its expression in dendritic cells is also regulated in a sex-specific manner.

1 While here we identified potential X-linked regulators of Th17 pathogenicity, it is important to note that  
2 Y chromosome loci, such as Yaa, can strongly influence autoimmune disease (Izui et al., 1995). A Y-  
3 chromosome element regulates the resistance of young SJL/J males to EAE (Spach et al., 2009). Intriguingly,  
4 the Y chromosome can have genome-wide imprinting effects: female mice display the EAE susceptibility of  
5 their male sires or grandsires (Teuscher et al., 2006) potentially as a result of copy number variation of Y  
6 chromosomal multicopy genes (Case et al., 2015). It would be interesting in the future to pinpoint a potential role  
7 for the Y chromosome in regulating disease severity in our model, perhaps via its genetic interaction with *Idd*  
8 loci (Wicker et al., 1995).

9 In conclusion, we show that male Th17 cells induce severe progressive CNS autoimmunity while  
0 adopting a plastic phenotype *in vivo*. Male Th17 pathogenesis is driven by sex chromosomal complement rather  
1 than by androgens. These findings represent an important advance in our understanding of how biological sex  
2 acts as a determinant of disease severity in CNS autoimmunity.

## 3 **Materials and Methods**

### 4 *Ethics statement*

5 All experimental protocols and breedings were approved by the Animal Protection Committee of the Centre de  
6 recherche du CHU de Québec - Université Laval (2017-037-2 and 2017-090-2; both to *M.R.*). All experiments  
7 involving human participation were approved by the Newfoundland Health Research Ethics Board with  
8 informed consent (to *C.S.M.*). MS patients were recruited through the Health Research Innovation Team in  
9 Multiple Sclerosis (HITMS) at Memorial University of Newfoundland, St. John's, Canada.

### 10 *Reagents and cytokines*

11 Flow cytometry monoclonal Abs (mAbs) against mouse antigens were obtained from eBioscience (CD4, clone  
12 RM4-5; CD3, clone 145-2C11; CD62L; clone MEL-14; IFN $\gamma$ , clone XMG1.2; TNF $\alpha$ , clone MP6-XT22; GM-  
13 CSF, clone MP1-22E9; FoxP3, clone FJK-16S), Biolegend (IL-17A, clone TC11-18H10.1; T-bet, clone 4B10),

1 BD (IL-2, clone JES6-5H4) or Invitrogen (ROR $\gamma$ t, clone AFKJS-9). The following mAbs, all obtained from  
2 BioXcell, were used for *in vitro* T cell cultures: anti-CD3 (clone 145- 2C11), anti-CD28 (clone 37.51), anti-  
3 IFN $\gamma$  (XMG1.2) and anti-IL-4 (clone 11B11). The following recombinant cytokines used for *in vitro* T cell  
4 cultures: recombinant human (rh) TGF $\beta$  (Miltenyi), recombinant mouse (rm) IL-6 (Miltenyi), rmIL-23 (R&D  
5 Biosystems), rmIL-12 (R&D Biosystems), rmIL-2 (Miltenyi). Inflammasome inhibitor VX-765 was obtained  
6 from AdooQ Biosciences.

7  
8 *Animals, EAE induction and monitoring*

9 1C6 mice were a kind gift of Dr. Vijay Kuchroo (Boston, MA). NOD.*Scid* mice were purchased from Jackson  
0 Laboratories (JAX) and were bred in our animal facility. CD4<sup>+</sup> T cells were isolated from 1C6 mice at 8-14  
1 weeks of age. NOD.*Scid* mice were used between 9-12 weeks of age. Where required, 1C6 were  
2 gonadectamized (castration/ovariectomy) or sham-operated at 3 weeks of age. For adoptive transfer of effector  
3 T cells, 5x10<sup>6</sup> Th17 or Th1 1C6 T cells were injected i.p., in cold PBS (Cellgro) into NOD.*Scid* recipient mice,  
4 which additionally received 200 ng of pertussis toxin (List Biological Labs) i.p. on d0 and d2 post-injection.  
5 Four Core Genotype (Tg-*Sry* XY<sup>*Sry*KO</sup>) mice on the C57BL/6J (B6) background were purchased from JAX and  
6 were bred to NOD or 1C6 females to obtain Tg-*Sry* XX and Tg-*Sry* XY<sup>*Sry*KO</sup> mice. FCG B6 x NOD F1 mice  
7 were actively immunized with 200  $\mu$ g MOG<sub>[35-55]</sub> in 100  $\mu$ L of complete Freund's adjuvant (Difco)  
8 supplemented with 500  $\mu$ g *M. tuberculosis* extract (Difco), and additionally received 200 ng pertussis toxin  
9 (List Biological Labs) on d0 and d2. Th1 and Th17 cells generated from FCG B6 x 1C6 mice were adoptively  
0 transferred to NOD.*Scid* at 2.5 x 10<sup>6</sup> cells/recipient. All EAE mice were weighed and assessed for disease  
1 symptoms daily for up to 70 days, using an established semi-quantitative scale that we have used previously  
2 (Boivin et al., 2015): 0, no disease; 1, decreased tail tone; 2, hind limb weakness or partial paralysis; 3,  
3 complete hindlimb paralysis; 4, front and hind limb paralysis; 5, moribund or dead. Moribund mice were  
4 euthanized with 24 hours if they did not show improvement, and were considered score 5 from that point until  
5 the end of the experiment. "Disease onset" is defined as being within 24 hours of the first signs of clinical  
6 symptoms. "Relapse" is defined as an increase in clinical score of  $\geq 1$  that lasts  $\geq 2$  days; "remission" as a



1 reduction of  $\geq 1$  that lasts  $\geq 2$  days (McCarthy et al., 2012). “Rapid course” is defined as attaining ethical  
2 endpoints prior to d70. A mouse was determined to have undergone chronic worsening disease if it a) increased  
3 in severity of  $\geq 1$  over a 10-day period, *and* b) at no point during the 10- day period had a day-over-day decrease  
4 of  $>0.5$  in score, *and* c) never remitted after the 10-day period *and* d) passed a threshold of score 2.5 either  
5 during or after the 10-day window. Disease was considered “relapsing/chronic” if it featured at least one  
6 relapse, in addition to the initial onset, followed by progressive disease. For inflammasome inhibition  
7 experiments, male mice were adoptively transferred with male Th17. Mice were alternately placed in treatment  
8 (VX-765; 50 mg/kg) or vehicle (DMSO) groups upon attaining score 2. Treatment was maintained for 8  
9 consecutive days.

### 1 *T cell purification and culture*

2 Mononuclear cell preparations were obtained from the spleens and lymph nodes (LN) of donor mice.  $CD4^+$  T  
3 cells were enriched using magnetic, anti-CD4 coated beads (Miltenyi) and were subsequently incubated with  
4 fluorochrome-labeled anti-CD62L. Naïve  $CD4^+CD62L^{hi}$  T cells were purified using a FACSAria (BD) high-  
5 speed cell sorter and were cultured in DMEM (Life Technologies) with 10% fetal calf serum (Corning) and  
6 supplemented as described (Sabatos et al., 2003). Cells were stimulated with  $2 \mu\text{g mL}^{-1}$  each of plate-bound  
7 anti-CD3 and anti-CD28, under Th17 ( $3 \text{ ng mL}^{-1}$  rhTGF $\beta$  +  $20 \text{ ng mL}^{-1}$  rmIL-6 +  $20 \mu\text{g mL}^{-1}$  anti-IFN $\gamma$ ) or Th1  
8 ( $10 \text{ ng mL}^{-1}$  rmIL-12 +  $10 \mu\text{g mL}^{-1}$  anti-IL-4) conditions. After 2 days, cells were re-plated in the absence of  
9 agonistic anti-CD3/CD28 but in the presence of  $20 \text{ ng mL}^{-1}$  rmIL-23 (for Th17) or  $10 \text{ ng mL}^{-1}$  rmIL-2 (for Th1)  
0 for an additional 3 days. Cells were collected and washed twice in cold PBS prior to injection.

### 1 *Histopathology*

2 Mice were euthanized and perfused first with cold PBS and then with 4% paraformaldehyde (PFA) through the  
3 left cardiac ventricle. Brains, optic nerves and spinal cords were dissected from the skull and spinal column,  
4 respectively. Tissues were stored for 24 hours in 4% PFA at 4°C and then for a minimum of 48 hours in PBS  
5 before being embedded in paraffin. Five  $\mu\text{m}$  thick sections of the brain, optic nerve and the spinal cord were  
6



1 stained with hematoxylin & eosin (H&E), Luxol fast blue for myelin or Bielschowsky's silver impregnation for  
2 neurons and axons (Bauer and Lassmann, 2016). The inflammatory infiltrate, and area of demyelination, per  
3 section was determined from 10 to 12 complete sections per cervical, thoracic and lumbar spinal cord and from  
4 complete cross sections of the optic nerve. For inflammation we counted the average number of perivascular  
5 inflammatory infiltrates per spinal cord cross sections. The area of demyelination was determined using a  
6 morphometric grid (Oji et al., 2016) at an objective lens magnification of 10x in sections stained with luxol fast  
7 blue by counting the number of grid points located of the area of myelin loss. The mean value per animal was  
8 determined by taking the average values for all sections from a given animal.

### 9 0 *CNS mononuclear cell isolation*

1 Mice were euthanized and perfused with cold PBS administered through the left cardiac ventricle. Brains and  
2 spinal cords were dissected from the skull and spinal column, respectively. CNS tissue were homogenized using  
3 a PTFE Tissue Grinder (VWR) and were incubated for 30 minutes at 37°C in homogenization solution (HBSS  
4 containing 4 ng mL<sup>-1</sup> liberase and 25 ng mL<sup>-1</sup> DNase). Homogenate were filtered through a 70 µm cell strainer,  
5 resuspended in 35% Percoll (GE Healthcare) and centrifuged. Mononuclear cells were collected, washed and  
6 prepared for flow cytometric analysis. For qPCR experiments, cells were stained with fluorochrome-labeled  
7 Abs to CD4, CD3 as well as Live/Dead indicator, and live CD4<sup>+</sup>CD3<sup>+</sup> cells were purified by high-speed cell  
8 sorting as described above.

### 9 0 *Flow cytometry*

1 Staining for cell surface markers was carried out for 30 minutes at 4°C. Prior to incubation with mAbs against  
2 cell surface markers, cells were incubated for 10 minutes in the presence of Fc Block (BD Biosciences) to  
3 prevent non-specific Ab binding to cells. For analysis of intracellular cytokine expression, cells were first  
4 cultured for 4 hours in the presence of 50 ng mL<sup>-1</sup> phorbol 12-myristate 13-acetate (Sigma-Aldrich), 1 µM  
5 ionomycin (Sigma-Aldrich) and GolgiStop (1 µL per mL culture; BD Biosciences). Cells were subsequently  
6 incubated with Fc Block (Biolegend) and fluorescent cell surface marker Abs and were then fixed and

1 permeabilized using Fixation and Perm/Wash buffers (eBioscience). They were then stained with fluorescent  
2 Abs against intracellular markers. True-Nuclear Transcription Buffer Set (Biolegend) was used for ROR $\gamma$ t and  
3 T-bet staining. FoxP3 Fix/Perm and Perm buffers (Biolegend) were used for FoxP3 staining. Flow cytometry  
4 data were collected using an LSRII flow cytometer (BD Biosciences) and were analyzed using FlowJo software  
5 (Treestar). Dead cells were excluded from analysis on the basis of positivity for Fixable Viability Dye  
6 (eBioscience). Gates were set on the basis of fluorescence minus one controls.

### 9 *Human CD4<sup>+</sup> T cell isolation, RNA extraction, and gene analysis*

0 Cryopreserved human PBMCs were thawed, quickly washed in sorting buffer (1% BSA in PBS, 1mM EDTA,  
1 10nM HEPES), and counted. Cells were then stained with anti-CD3 and anti-CD4 antibodies (BD Biosciences),  
2 in addition to Aqua Fluorescence Reactive Dye (ThermoFisher) according to manufacturer's protocol.  
3 Following a wash, stained CD3<sup>+</sup>CD4<sup>+</sup> cells were sorted using FACS (Astrios, BD Biosciences) and  
4 immediately placed in Trizol LS (ThermoFisher). RNA extraction and DNase treatment was performed  
5 according to manufacturer's instruction using a RNeasy Micro kit (Qiagen). Purified RNA (200ng) was reverse-  
6 transcribed to cDNA (M-MLV RT kit; ThermoFisher).

### 8 *Quantitative PCR*

9 RNA were isolated from purified CD4<sup>+</sup> T cells using Direct-zol RNA Purification Kit (Zymo Research) and  
0 cDNA were generated using iScript Reverse Transcriptase (Bio-Rad). qPCR was carried out on a Lightcycler  
1 480 II (Roche) using Taqman validated FAM-labeled probes and Gene Expression Master Mix (Applied  
2 Biosystems). Samples were run in triplicate. *Rps18* was used as a housekeeping control for mouse studies  
3 (Axtner and Sommer, 2009; Cooley et al., 2015). For analysis of human CD4<sup>+</sup> T cells, qPCR was performed on  
4 reverse-transcribed cDNA using Taqman-validated probes for *Jarid1c* and the housekeeping genes 18S and  
5 GAPDH, on a Vii7 Real-Time PCR System (ThermoFisher). The mean of 18S and GAPDH values was used a  
6 reference for human studies.

1

## 2 *Bioinformatics analysis*

3 We retrieved transcriptomic data from GEO project GSE75105 (Gaublomme et al., 2015). The six Paired-end  
4 RNAseq fastq datasets were trimmed using trimmomatic v0.36 using this command:

5

```
6 java -jar -Xmx14G trimmomatic-0.36.jar PE -threads 8 -phred33 sample_R1.fastq.gz sample_R2.fastq.gz  
7 trimmed/fastq_R1.fastq.gz trimmed/sample_R1_unpaired.fastq.gz trimmed/sample_R2.fastq.gz trimmed  
8 /sample_R2_unpaired.fastq.gz  
9 ILLUMINACLIP:adapters.fa:2:30:10 TRAILING:30  
0 SLIDINGWINDOW:4:20 MINLEN:30.
```

1

2 Then, trimmed fastq files were mapped on *Mus musculus* (taxid: 10090) Ensembl genome version 92  
3 (Mus\_musculus.GRCm38.cdna.standard\_chr.fa.gz.idx) using Kallisto 0.44.0. Finally, differential expression  
4 between groups CNS and LN were performed using DESeq2 v1.18.1

5

## 6 *Statistical analysis*

7 Two-tailed comparisons were made in all cases. For EAE data, *t*-test was used to analyze mean day of onset and  
8 mean number of relapses. Mann-Whitney *U* test was used to analyze mean maximal severity and severity on  
9 individual days. ANOVA and Dunn's multiple comparisons test was used when three or more groups were  
0 compared. Fisher's exact test was used to analyze disease incidence, mortality incidence and progressive phase  
1 incidence. Bonferroni's correction was applied when three groups were compared. Slopes of the disease onset  
2 curve were obtained and analyzed by performing linear regression (Boivin et al., 2015). Flow cytometric  
3 (percentages of marker-positive cells) and qPCR data were analyzed by Student's *t*-test. ANOVA and Tukey's  
4 multiple comparisons test was used when three or more groups were compared. Histopathological  
5 quantification data were analyzed by Mann-Whitney *U* test. All statistical analyses were performed using Prism  
6 (GraphPad), with the exception of Fisher's exact test (QuickCalc online tool,

1 <https://www.graphpad.com/quickcalcs/contingency1.cfm>; GraphPad). Error bars represent standard error  
2 (s.e.m.).

## 4 **Acknowledgements**

5  
6 We thank Vijay K. Kuchroo for providing us with 1C6 mice; Mohammad Balood, Alexandre Brunet and Julie-  
7 Christine Lévesque for technical assistance; and Julie Savage and Youjin Lee for critical review of the  
8 manuscript. P.M.I.A.D is supported by a Doctoral Studentship from the Multiple Sclerosis Society of Canada  
9 (MSSOC). M.R. is supported by a «*Junior-2 chercheurs-boursiers*» salary support award from the Fonds de  
0 Recherche de Québec – Santé (FRQS). The work was funded by an Operating Grant (#3036) from the MSSOC  
1 as well as by a Catalyst Grant on Sex and Gender as Variables in Biomedical Research from the Canadian  
2 Institutes of Health Research (CIHR), both to M.R.

## 4 **References**

- 5  
6 Abromson-Leeman, S., Bronson, R.T., Dorf, M.E., 2009. Encephalitogenic T cells that stably express both T-  
7 bet and ROR gamma t consistently produce IFN $\gamma$  but have a spectrum of IL-17 profiles. *J.*  
8 *Neuroimmunol.* 215, 10–24. doi:10.1016/j.jneuroim.2009.07.007  
9 Anderson, A.C., Chandwaskar, R., Lee, D.H., Sullivan, J.M., Solomon, A., Rodriguez-Manzanet, R., Greve, B.,  
0 Sobel, R.A., Kuchroo, V.K., 2012. A transgenic model of central nervous system autoimmunity mediated  
1 by CD4+ and CD8+ T and B cells. *J. Immunol.* 188, 2084–2092. doi:10.4049/jimmunol.1102186  
2 Arnold, A.P., Chen, X., 2009. What does the “four core genotypes” mouse model tell us about sex differences  
3 in the brain and other tissues? *Front Neuroendocrinol* 30, 1–9. doi:10.1016/j.yfrne.2008.11.001  
4 Arnold, A.P., Reue, K., Eghbali, M., Vilain, E., Chen, X., Ghahramani, N., Itoh, Y., Li, J., Link, J.C., Ngun, T.,  
5 Williams-Burris, S.M., 2016. The importance of having two X chromosomes. *Philos. Trans. R. Soc. Lond.,*  
6 *B, Biol. Sci.* 371, 20150113. doi:10.1098/rstb.2015.0113  
7 Axtner, J., Sommer, S., 2009. Validation of internal reference genes for quantitative real-time PCR in a non-  
8 model organism, the yellow-necked mouse, *Apodemus flavicollis*. *BMC Res Notes* 2, 264.  
9 doi:10.1186/1756-0500-2-264  
0 Bauer, J., Lassmann, H., 2016. Neuropathological Techniques to Investigate Central Nervous System Sections  
1 in Multiple Sclerosis. *Methods Mol. Biol.* 1304, 211–229. doi:10.1007/7651\_2014\_151  
2 Beatty, W.W., Aupperle, R.L., 2002. Sex differences in cognitive impairment in multiple sclerosis. *Clin*  
3 *Neuropsychol* 16, 472–480. doi:10.1076/clin.16.4.472.13904  
4 Bebo, B.F., Zelinka-Vincent, E., Adamus, G., Amundson, D., Vandenbark, A.A., Offner, H., 1998. Gonadal  
5 hormones influence the immune response to PLP 139-151 and the clinical course of relapsing experimental  
6 autoimmune encephalomyelitis. *J. Neuroimmunol.* 84, 122–130.

- 1 Becher, B., Tugues, S., Greter, M., 2016. GM-CSF: From Growth Factor to Central Mediator of Tissue  
2 Inflammation. *Immunity* 45, 963–973. doi:10.1016/j.immuni.2016.10.026
- 3 Bending, D., la Peña, De, H., Veldhoen, M., Phillips, J.M., Uyttenhove, C., Stockinger, B., Cooke, A., 2009.  
4 Highly purified Th17 cells from BDC2.5NOD mice convert into Th1-like cells in NOD/SCID recipient  
5 mice. *J. Clin. Invest.* 119, 565–572. doi:10.1172/JCI37865
- 6 Berard, J.L., Wolak, K., Fournier, S., David, S., 2010. Characterization of relapsing-remitting and chronic forms  
7 of experimental autoimmune encephalomyelitis in C57BL/6 mice. *Glia* 58, 434–445.  
8 doi:10.1002/glia.20935
- 9 Berletch, J.B., Ma, W., Yang, F., Shendure, J., Noble, W.S., Disteche, C.M., Deng, X., 2015. Escape from X  
0 inactivation varies in mouse tissues. *PLoS Genet.* 11, e1005079. doi:10.1371/journal.pgen.1005079
- 1 Bettelli, E., Carrier, Y., Gao, W., Korn, T., Strom, T.B., Oukka, M., Weiner, H.L., Kuchroo, V.K., 2006.  
2 Reciprocal developmental pathways for the generation of pathogenic effector TH17 and regulatory T cells.  
3 *Nature* 441, 235–238. doi:10.1038/nature04753
- 4 Bobbala, D., Chen, X.-L., Leblanc, C., Mayhue, M., Stankova, J., Tanaka, T., Chen, Y.-G., Ilangumaran, S.,  
5 Ramanathan, S., 2012. Interleukin-15 plays an essential role in the pathogenesis of autoimmune diabetes in  
6 the NOD mouse. *Diabetologia* 55, 3010–3020. doi:10.1007/s00125-012-2675-1
- 7 Boivin, N., Baillargeon, J., Doss, P.M.I.A., Roy, A.-P., Rangachari, M., 2015. Interferon- $\beta$  suppresses murine  
8 Th1 cell function in the absence of antigen-presenting cells. *PLoS ONE* 10, e0124802.  
9 doi:10.1371/journal.pone.0124802
- 0 Boukhaled, G.M., Cordeiro, B., Deblois, G., Dimitrov, V., Bailey, S.D., Holowka, T., Domi, A., Guak, H.,  
1 Chiu, H.-H.C., Everts, B., Pearce, E.J., Lupien, M., White, J.H., Krawczyk, C.M., 2016. The  
2 Transcriptional Repressor Polycomb Group Factor 6, PCGF6, Negatively Regulates Dendritic Cell  
3 Activation and Promotes Quiescence. *Cell Rep* 16, 1829–1837. doi:10.1016/j.celrep.2016.07.026
- 4 Browne, P., Chandraratna, D., Angood, C., Tremlett, H., Baker, C., Taylor, B.V., Thompson, A.J., 2014. Atlas  
5 of Multiple Sclerosis 2013: A growing global problem with widespread inequity. *Neurology* 83, 1022–  
6 1024. doi:10.1212/WNL.0000000000000768
- 7 Carbajal, K.S., Mironova, Y., Ulrich-Lewis, J.T., Kulkarni, D., Grifka-Walk, H.M., Huber, A.K., Shrager, P.,  
8 Giger, R.J., Segal, B.M., 2015. Th Cell Diversity in Experimental Autoimmune Encephalomyelitis and  
9 Multiple Sclerosis. *J. Immunol.* 195, 2552–2559. doi:10.4049/jimmunol.1501097
- 0 Case, L.K., Wall, E.H., Osmanski, E.E., Dragon, J.A., Saligrama, N., Zachary, J.F., Lemos, B., Blankenhorn,  
1 E.P., Teuscher, C., 2015. Copy number variation in Y chromosome multicopy genes is linked to a paternal  
2 parent-of-origin effect on CNS autoimmune disease in female offspring. *Genome Biol.* 16, 28.  
3 doi:10.1186/s13059-015-0591-7
- 4 Christianson, S.W., Shultz, L.D., Leiter, E.H., 1993. Adoptive transfer of diabetes into immunodeficient NOD-  
5 scid/scid mice. Relative contributions of CD4<sup>+</sup> and CD8<sup>+</sup> T-cells from diabetic versus prediabetic  
6 NOD.NON-Thy-1a donors. *Diabetes* 42, 44–55.
- 7 Cooley, I.D., Read, K.A., Oestreich, K.J., 2015. Trans-presentation of IL-15 modulates STAT5 activation and  
8 Bcl-6 expression in TH1 cells. *Sci Rep* 5, 15722. doi:10.1038/srep15722
- 9 Dang, P.T., Bui, Q., D'Souza, C.S., Orian, J.M., 2015. Modelling MS: Chronic-Relapsing EAE in the NOD/Lt  
0 Mouse Strain. *Curr Top Behav Neurosci* 26, 143–177. doi:10.1007/7854\_2015\_378
- 1 Dhaeze, T., Lachance, C., Tremblay, L., Grasmuck, C., Bourbonnière, L., Larouche, S., Saint-Laurent, O.,  
2 Lécuyer, M.-A., Rébillard, R.-M., Zandee, S., Prat, A., 2019. Sex-dependent factors encoded in the immune  
3 compartment dictate relapsing or progressive phenotype in demyelinating disease. *JCI Insight* 4.  
4 doi:10.1172/jci.insight.124885
- 5 Du, S., Itoh, N., Askarinam, S., Hill, H., Arnold, A.P., Voskuhl, R.R., 2014. XY sex chromosome complement,  
6 compared with XX, in the CNS confers greater neurodegeneration during experimental autoimmune  
7 encephalomyelitis. *Proc. Natl. Acad. Sci. U.S.A.* 111, 2806–2811. doi:10.1073/pnas.1307091111
- 8 Dunn, S.E., Lee, H., Pavri, F.R., Zhang, M.A., 2015. Sex-Based Differences in Multiple Sclerosis (Part I):  
9 Biology of Disease Incidence. *Curr Top Behav Neurosci* 26, 29–56. doi:10.1007/7854\_2015\_371
- 0 Farez, M.F., Quintana, F.J., Gandhi, R., Izquierdo, G., Lucas, M., Weiner, H.L., 2009. Toll-like receptor 2 and  
1 poly(ADP-ribose) polymerase 1 promote central nervous system neuroinflammation in progressive EAE.

- 1 10, 958–964. doi:10.1038/ni.1775
- 2 Gaublotte, J.T., Yosef, N., Lee, Y., Gertner, R.S., Yang, L.V., Wu, C., Pandolfi, P.P., Mak, T., Satija, R.,  
3 Shalek, A.K., Kuchroo, V.K., Park, H., Regev, A., 2015. Single-Cell Genomics Unveils Critical Regulators  
4 of Th17 Cell Pathogenicity. *Cell* 163, 1400–1412. doi:10.1016/j.cell.2015.11.009
- 5 Goncalves DaSilva, A., Liaw, L., Yong, V.W., 2010. Cleavage of osteopontin by matrix metalloproteinase-12  
6 modulates experimental autoimmune encephalomyelitis disease in C57BL/6 mice. *Am. J. Pathol.* 177,  
7 1448–1458. doi:10.2353/ajpath.2010.091081
- 8 Gracey, E., Yao, Y., Green, B., Qaiyum, Z., Baglaenko, Y., Lin, A., Anton, A., Ayearst, R., Yip, P., Inman,  
9 R.D., 2016. Sexual Dimorphism in the Th17 Signature of Ankylosing Spondylitis. *Arthritis Rheumatol* 68,  
0 679–689. doi:10.1002/art.39464
- 1 Greer, J.M., McCombe, P.A., 2011. Role of gender in multiple sclerosis: clinical effects and potential molecular  
2 mechanisms. *J. Neuroimmunol.* 234, 7–18. doi:10.1016/j.jneuroim.2011.03.003
- 3 Hirota, K., Duarte, J.H., Veldhoen, M., Hornsby, E., Li, Y., Cua, D.J., Ahlfors, H., Wilhelm, C., Tolaini, M.,  
4 Menzel, U., Gafaralaki, A., Potocnik, A.J., Stockinger, B., 2011. Fate mapping of IL-17-producing T cells  
5 in inflammatory responses. *Nat. Immunol.* 12, 255–263. doi:10.1038/ni.1993
- 6 Huber, A.K., Wang, L., Han, P., Zhang, X., Ekholm, S., Srinivasan, A., Irani, D.N., Segal, B.M., 2014.  
7 Dysregulation of the IL-23/IL-17 axis and myeloid factors in secondary progressive MS. *Neurology* 83,  
8 1500–1507. doi:10.1212/WNL.0000000000000908
- 9 Hummel, S., Wilms, D., Vitacolonna, M., Zöller, M., 2002. Donor T cell and host NK depletion improve the  
0 therapeutic efficacy of allogeneic bone marrow cell reconstitution in the nonmyeloablatively conditioned  
1 tumor-bearing host. *J. Leukoc. Biol.* 72, 898–912.
- 2 Izui, S., Iwamoto, M., Fossati, L., Merino, R., Takahashi, S., Ibnou-Zekri, N., 1995. The Yaa gene model of  
3 systemic lupus erythematosus. *Immunol. Rev.* 144, 137–156.
- 4 Jane-wit, D., Altuntas, C.Z., Monti, J., Johnson, J.M., Forsthuber, T.G., Tuohy, V.K., 2008. Sex-defined T-cell  
5 responses to cardiac self determine differential outcomes of murine dilated cardiomyopathy. *Am. J. Pathol.*  
6 172, 11–21. doi:10.2353/ajpath.2008.070324
- 7 Jäger, A., Dardalhon, V., Sobel, R.A., Bettelli, E., Kuchroo, V.K., 2009. Th1, Th17, and Th9 effector cells  
8 induce experimental autoimmune encephalomyelitis with different pathological phenotypes. *J. Immunol.*  
9 183, 7169–7177. doi:10.4049/jimmunol.0901906
- 0 Kebir, H., Ifergan, I., Alvarez, J.I., Bernard, M., Poirier, J., Arbour, N., Duquette, P., Prat, A., 2009. Preferential  
1 recruitment of interferon-gamma-expressing TH17 cells in multiple sclerosis. *Ann. Neurol.* 66, 390–402.  
2 doi:10.1002/ana.21748
- 3 Koch, M., Kingwell, E., Rieckmann, P., Tremlett, H., UBC MS Clinic Neurologists, 2010. The natural history  
4 of secondary progressive multiple sclerosis. *J. Neurol. Neurosurg. Psychiatr.* 81, 1039–1043.  
5 doi:10.1136/jnnp.2010.208173
- 6 Kurschus, F.C., Croxford, A.L., Heinen, A.P., Wörtge, S., Ielo, D., Waisman, A., 2010. Genetic proof for the  
7 transient nature of the Th17 phenotype. *Eur. J. Immunol.* 40, 3336–3346. doi:10.1002/eji.201040755
- 8 Larochelle, C., Uphaus, T., Prat, A., Zipp, F., 2016. Secondary Progression in Multiple Sclerosis: Neuronal  
9 Exhaustion or Distinct Pathology? *Trends in Neurosciences* 39, 325–339. doi:10.1016/j.tins.2016.02.001
- 0 Lee, Y., Awasthi, A., Yosef, N., Quintana, F.J., Xiao, S., Peters, A., Wu, C., Kleinewietfeld, M., Kunder, S.,  
1 Hafler, D.A., Sobel, R.A., Regev, A., Kuchroo, V.K., 2012. Induction and molecular signature of  
2 pathogenic TH17 cells. *Nat. Immunol.* 13, 991–999. doi:10.1038/ni.2416
- 3 Lee, Y.K., Turner, H., Maynard, C.L., Oliver, J.R., Chen, D., Elson, C.O., Weaver, C.T., 2009. Late  
4 developmental plasticity in the T helper 17 lineage. *Immunity* 30, 92–107.  
5 doi:10.1016/j.immuni.2008.11.005
- 6 Li, Z., Yue, Y., Xiong, S., 2013. Distinct Th17 inductions contribute to the gender bias in CVB3-induced  
7 myocarditis. *Cardiovasc. Pathol.* 22, 373–382. doi:10.1016/j.carpath.2013.02.004
- 8 Martin-Orozco, N., Chung, Y., Chang, S.H., Wang, Y.-H., Dong, C., 2009. Th17 cells promote pancreatic  
9 inflammation but only induce diabetes efficiently in lymphopenic hosts after conversion into Th1 cells. *Eur.*  
0 *J. Immunol.* 39, 216–224. doi:10.1002/eji.200838475
- 1 Mayo, L., Cunha, A.P.D., Madi, A., Beynon, V., Yang, Z., Alvarez, J.I., Prat, A., Sobel, R.A., Kobzik, L.,



- 1 Lassmann, H., Quintana, F.J., Weiner, H.L., 2016. IL-10-dependent Tr1 cells attenuate astrocyte activation  
2 and ameliorate chronic central nervous system inflammation. *Brain* 139, 1939–1957.  
3 doi:10.1093/brain/aww113
- 4 Mayo, L., Trauger, S.A., Blain, M., Nadeau, M., Patel, B., Alvarez, J.I., Mascanfroni, I.D., Yeste, A., Kivisäkk,  
5 P., Kallas, K., Ellezam, B., Bakshi, R., Prat, A., Antel, J.P., Weiner, H.L., Quintana, F.J., 2014. Regulation  
6 of astrocyte activation by glycolipids drives chronic CNS inflammation. *Nat. Med.* 20, 1147–1156.  
7 doi:10.1038/nm.3681
- 8 McCarthy, D.P., Richards, M.H., Miller, S.D., 2012. Mouse models of multiple sclerosis: experimental  
9 autoimmune encephalomyelitis and Theiler's virus-induced demyelinating disease. *Methods Mol. Biol.* 900,  
0 381–401. doi:10.1007/978-1-60761-720-4\_19
- 1 McKenzie, B.A., Mamik, M.K., Saito, L.B., Boghozian, R., Monaco, M.C., Major, E.O., Lu, J.-Q., Branton,  
2 W.G., Power, C., 2018. Caspase-1 inhibition prevents glial inflammasome activation and pyroptosis in  
3 models of multiple sclerosis. *Proc. Natl. Acad. Sci. U.S.A.* 115, E6065–E6074.  
4 doi:10.1073/pnas.1722041115
- 5 McRae, B.L., Vanderlugt, C.L., Dal Canto, M.C., Miller, S.D., 1995. Functional evidence for epitope spreading  
6 in the relapsing pathology of experimental autoimmune encephalomyelitis. *J. Exp. Med.* 182, 75–85.
- 7 Menon, S., Shirani, A., Zhao, Y., Oger, J., Traboulsee, A., Freedman, M.S., Tremlett, H., 2013. Characterising  
8 aggressive multiple sclerosis. *J. Neurol. Neurosurg. Psychiatr.* 84, 1192–1198. doi:10.1136/jnnp-2013-  
9 304951
- 0 Oji, S., Nicolussi, E.-M., Kaufmann, N., Zeka, B., Schanda, K., Fujihara, K., Illés, Z., Dahle, C., Reindl, M.,  
1 Lassmann, H., Bradl, M., 2016. Experimental Neuromyelitis Optica Induces a Type I Interferon Signature  
2 in the Spinal Cord. *PLoS ONE* 11, e0151244. doi:10.1371/journal.pone.0151244
- 3 Orton, S.-M., Herrera, B.M., Yee, I.M., Valdar, W., Ramagopalan, S.V., Sadovnick, A.D., Ebers, G.C.,  
4 Canadian Collaborative Study Group, 2006. Sex ratio of multiple sclerosis in Canada: a longitudinal study.  
5 *Lancet Neurol* 5, 932–936. doi:10.1016/S1474-4422(06)70581-6
- 6 Outchkourov, N.S., Muiño, J.M., Kaufmann, K., van Ijcken, W.F.J., Groot Koerkamp, M.J., van Leenen, D., de  
7 Graaf, P., Holstege, F.C.P., Grosveld, F.G., Timmers, H.T.M., 2013. Balancing of histone H3K4  
8 methylation states by the Kdm5c/SMCX histone demethylase modulates promoter and enhancer function.  
9 *Cell Rep* 3, 1071–1079. doi:10.1016/j.celrep.2013.02.030
- 0 Palaszynski, K.M., Loo, K.K., Ashouri, J.F., Liu, H.-B., Voskuhl, R.R., 2004. Androgens are protective in  
1 experimental autoimmune encephalomyelitis: implications for multiple sclerosis. *J. Neuroimmunol.* 146,  
2 144–152.
- 3 Palaszynski, K.M., Smith, D.L., Kamrava, S., Burgoyne, P.S., Arnold, A.P., Voskuhl, R.R., 2005. A yin-yang  
4 effect between sex chromosome complement and sex hormones on the immune response. *Endocrinology*  
5 146, 3280–3285. doi:10.1210/en.2005-0284
- 6 Rangachari, M., Zhu, C., Sakuishi, K., Xiao, S., Karman, J., Chen, A., Angin, M., Wakeham, A., Greenfield,  
7 E.A., Sobel, R.A., Okada, H., McKinnon, P.J., Mak, T.W., Addo, M.M., Anderson, A.C., Kuchroo, V.K.,  
8 2012. Bat3 promotes T cell responses and autoimmunity by repressing Tim-3–mediated cell death and  
9 exhaustion. *Nat. Med.* 18, 1394–1400. doi:10.1038/nm.2871
- 0 Rohane, P.W., Shimada, A., Kim, D.T., Edwards, C.T., Charlton, B., Shultz, L.D., Fathman, C.G., 1995. Islet-  
1 infiltrating lymphocytes from prediabetic NOD mice rapidly transfer diabetes to NOD-scid/scid mice.  
2 *Diabetes* 44, 550–554.
- 3 Romme Christensen, J., Börnsen, L., Ratzner, R., Piehl, F., Khademi, M., Olsson, T., Sørensen, P.S., Sellebjerg,  
4 F., 2013. Systemic inflammation in progressive multiple sclerosis involves follicular T-helper, Th17- and  
5 activated B-cells and correlates with progression. *PLoS ONE* 8, e57820. doi:10.1371/journal.pone.0057820
- 6 Rubtsov, A.V., Rubtsova, K., Kappler, J.W., Marrack, P., 2010. Genetic and hormonal factors in female-biased  
7 autoimmunity. *Autoimmun Rev* 9, 494–498. doi:10.1016/j.autrev.2010.02.008
- 8 Sabatos, C.A., Chakravarti, S., Cha, E., Schubart, A., Sánchez-Fueyo, A., Zheng, X.X., Coyle, A.J., Strom,  
9 T.B., Freeman, G.J., Kuchroo, V.K., 2003. Interaction of Tim-3 and Tim-3 ligand regulates T helper type 1  
0 responses and induction of peripheral tolerance. *Nat. Immunol.* 4, 1102–1110. doi:10.1038/ni988
- 1 Scalfari, A., Neuhaus, A., Daumer, M., Deluca, G.C., Muraro, P.A., Ebers, G.C., 2013. Early relapses, onset of

- 1 progression, and late outcome in multiple sclerosis. *JAMA Neurol* 70, 214–222.  
2 doi:10.1001/jamaneurol.2013.599
- 3 Sloka, S., Silva, C., Pryse-Phillips, W., Patten, S., Metz, L., Yong, V.W., 2011. A quantitative analysis of  
4 suspected environmental causes of MS. *Can J Neurol Sci* 38, 98–105.
- 5 Smith-Bouvier, D.L., Divekar, A.A., Sasidhar, M., Du, S., Tiwari-Woodruff, S.K., King, J.K., Arnold, A.P.,  
6 Singh, R.R., Voskuhl, R.R., 2008. A role for sex chromosome complement in the female bias in  
7 autoimmune disease. *J. Exp. Med.* 205, 1099–1108. doi:10.1084/jem.20070850
- 8 Spach, K.M., Blake, M., Bunn, J.Y., McElvany, B., Noubade, R., Blankenhorn, E.P., Teuscher, C., 2009.  
9 Cutting edge: the Y chromosome controls the age-dependent experimental allergic encephalomyelitis  
0 sexual dimorphism in SJL/J mice. *J. Immunol.* 182, 1789–1793. doi:10.4049/jimmunol.0803200
- 1 Suryani, S., Sutton, I., 2007. An interferon-gamma-producing Th1 subset is the major source of IL-17 in  
2 experimental autoimmune encephalitis. *J. Neuroimmunol.* 183, 96–103.  
3 doi:10.1016/j.jneuroim.2006.11.023
- 4 Szabo, S.J., Kim, S.T., Costa, G.L., Zhang, X., Fathman, C.G., Glimcher, L.H., 2000. A novel transcription  
5 factor, T-bet, directs Th1 lineage commitment. *Cell* 100, 655–669.
- 6 Teuscher, C., Noubade, R., Spach, K., McElvany, B., Bunn, J.Y., Fillmore, P.D., Zachary, J.F., Blankenhorn,  
7 E.P., 2006. Evidence that the Y chromosome influences autoimmune disease in male and female mice.  
8 *Proc. Natl. Acad. Sci. U.S.A.* 103, 8024–8029. doi:10.1073/pnas.0600536103
- 9 Tremlett, H., Paty, D., Devonshire, V., 2006. Disability progression in multiple sclerosis is slower than  
0 previously reported. *Neurology* 66, 172–177. doi:10.1212/01.wnl.0000194259.90286.fe
- 1 Trooster, W.J., Teelken, A.W., Gerrits, P.O., Lijnema, T.H., Loof, J.G., Minderhoud, J.M., Nieuwenhuis, P.,  
2 1996. The effect of gonadectomy on the clinical course of chronic experimental allergic encephalomyelitis.  
3 *Clin Neurol Neurosurg* 98, 222–226.
- 4 Wicker, L.S., Todd, J.A., Peterson, L.B., 1995. Genetic control of autoimmune diabetes in the NOD mouse.  
5 *Annu. Rev. Immunol.* 13, 179–200. doi:10.1146/annurev.iy.13.040195.001143
- 6 Yi, A., Jian, L., Xiaojing, H., Hui, X., 2009. The prevalence of Th17 cells in patients with dilated  
7 cardiomyopathy. *Clin Invest Med* 32, E144–50.
- 8 Yosef, N., Shalek, A.K., Gaublot, J.T., Jin, H., Lee, Y., Awasthi, A., Wu, C., Karwacz, K., Xiao, S.,  
9 Jorgolli, M., Gennert, D., Satija, R., Shakya, A., Lu, D.Y., Trombetta, J.J., Pillai, M.R., Ratcliffe, P.J.,  
0 Coleman, M.L., Bix, M., Tantin, D., Park, H., Kuchroo, V.K., Regev, A., 2013. Dynamic regulatory  
1 network controlling TH17 cell differentiation. *Nature* 496, 461–468. doi:10.1038/nature11981
- 2 Zhang, M.A., Rego, D., Moshkova, M., Kebir, H., Chruscinski, A., Nguyen, H., Akkermann, R., Stanczyk, F.Z.,  
3 Prat, A., Steinman, L., Dunn, S.E., 2012. Peroxisome proliferator-activated receptor (PPAR) $\alpha$  and  $\gamma$   
4 regulate IFN $\gamma$  and IL-17A production by human T cells in a sex-specific way. *Proc. Natl. Acad. Sci. U.S.A.*  
5 109, 9505–9510. doi:10.1073/pnas.1118458109
- 6 Zhu, J., Yamane, H., Paul, W.E., 2010. Differentiation of effector CD4 T cell populations (\*). *Annu. Rev.*  
7 *Immunol.* 28, 445–489. doi:10.1146/annurev-immunol-030409-101212
- 8
- 9

## 0 **Figure legends**

1

2 **Figure 1. Male 1C6 Th17 transfer disease of earlier onset and exacerbated severity. A.** Schematic depicting  
3 the experimental approach. Tg, transgenic. **B.** Female and male 1C6 Th17 cells were generated *in vitro* as  
4 depicted in (A) and Roryt expression was measured by flow cytometry at d5 of culture prior to adoptive



1 transfer. Gated on live CD4<sup>+</sup> events. Representative of 3 experiments. **C.** Female and male 1C6 Th17 were  
2 adoptively transferred to sex-matched NOD.*Scid* recipients that were monitored for signs of EAE up to d70  
3 post-transfer. A proportion of male recipients (M<sup>rapid</sup>, n=4) attained ethical endpoints before d70. No significant  
4 differences in day-to-day disease score were observed between males that survived to d70 (M<sup>late</sup>, n=5) and  
5 females.  $\Phi$ , all mice in the group attained ethical endpoints. Representative of 4 transfer experiments.  
6 Percentages in the graph legend refer to all mice studied. **D-H.** Female or male 1C6 Th17 were transferred sex-  
7 matched NOD.*Scid* that were sacrificed at disease onset (**D, F, G**) or at experimental endpoints (**E, F, H**).  
8 Female, n=8; Male, n=6. All male endpoint mice experienced a rapid disease course; all female endpoint mice  
9 survived to d70. **D, E.** The presence of inflammatory foci (H&E) and demyelination (Luxol fast blue, LFB)  
0 were quantified (**D**) from paraffinized spinal cord sections at onset (4 females, 5 males) or endpoint (8 females,  
1 6 males). Symbols represent individual mice. Error bars represent s.e.m. \*\* p<0.01, *t*-test. **F.** Optic nerve  
2 sections were taken from female and male recipients at onset or endpoint. Leukocyte infiltration (H&E),  
3 demyelination (LFB) and axon damage (Bielschowsky's silver stain; Biel) were assessed. Representative of 4  
4 females and 4 males. **G.** Inflammatory lesions in the CNS of Th17 recipients at disease onset. Clockwise from  
5 upper left: cerebellum (Cer), Th17 female; medulla (Med), Th17 female; thalamus (Thal), Th17 male;  
6 mesencephalon (Mes), Th17 male. **H.** Demyelinating lesions in the medullae of a female (*top*) and male  
7 (*bottom*) Th17 recipient at endpoint. 10X magnification for all images.

8  
9 **Figure 2. Peripheral male Th17 show increased IFN $\gamma$  in early disease.** **A.** Male or female 1C6 Th17 were  
0 transferred to female NOD.*Scid* that were monitored for signs of EAE. M $\rightarrow$ F, n=7; F $\rightarrow$ F, n=6. **B.** Male or  
1 female 1C6 Th17 were transferred to male NOD.*Scid* that were monitored for signs of EAE. M $\rightarrow$ M, n=8;  
2 F $\rightarrow$ M, n=5. \* p<0.05, Mann-Whitney *U* test. **C.** Female recipients of female Th17 or male recipients of male  
3 Th17 were sacrificed at disease onset, and production of IL-17 and IFN $\gamma$  from splenic CD4<sup>+</sup> T cells was  
4 assessed by intracellular flow cytometry. FACS plots representative of F, n=12; M, n=7. \* p<0.05, *t*-test.  
5 Rightmost FACS plots, fluorescence minus one (FMO) controls from the male mouse presented in this panel.  
6 **D.** Production of IL-17 and IFN $\gamma$  from CD4<sup>+</sup> splenic T cells from female or male Th17 cells at relapse. F, n=5;

1 M, n=3. \*  $p < 0.05$ , *t*-test. **E.** Production of IL-17 and IFN $\gamma$  from CNS-infiltrating CD4<sup>+</sup> T cells from male or  
2 female Th17 recipients at onset (*top row*) or relapse (*bottom row*). Error bars, s.e.m. Each circle represents an  
3 individual mouse.

4  
5 **Figure 3. Highly pathogenic male Th17 cells strongly upregulate IFN $\gamma$ .** Recipients of female and male 1C6  
6 Th17 were monitored and sacrificed at experimental endpoints. 8 males (M<sup>rapid</sup>) experienced a rapid and lethal  
7 disease course; 5 males (M<sup>late</sup>) survived to d70. All females (n=14) survived to d70. Production of IL-17 and  
8 IFN $\gamma$  from splenic (**A**) and CNS-infiltrating (**B**) CD4<sup>+</sup> T cells was assessed by intracellular flow cytometry from  
9 individual mice. Left plots (**A,B**) are representative of the indicated groups. Gated on live CD4<sup>+</sup> events with box  
0 gates based on fluorescence minus one controls. **C.** Mean fluorescence intensity of the indicated cytokines was  
1 measured from CNS samples. \*\*,  $p < 0.01$ ; \*\*\*,  $p < 0.001$ ; \*\*\*\*,  $p < 0.0001$ ; Tukey's multiple comparisons test  
2 after one-way ANOVA.

3  
4 **Figure 4. Male Th1 cells do not induce rapid and lethal EAE.** Male and female Th1 cells were generated *in*  
5 *vitro* from naïve 1C6 CD4<sup>+</sup>CD62L<sup>hi</sup> progenitors **A.** T-bet expression was measured by flow cytometry at d5 of  
6 culture prior to adoptive transfer. Gated on live CD4<sup>+</sup> events. Solid blue line, female cells; dashed red line, male  
7 cells; dotted black line, FMO (fluorescence minus one) control. Representative of 3 experiments. **B.** Th1 cells  
8 were adoptively transferred to sex-matched NOD.Scid male (n=4) or female (n=5) recipients that were  
9 monitored for signs of EAE. Day-over-day disease curve of male vs female Th1 recipients (*top*); linear  
0 regression analysis of the disease curves (*bottom*). Representative of 2 transfers.

1  
2 **Figure 5. Male sex augments Th17 transcriptional plasticity in a disease duration-dependent manner.**  
3 Male and female 1C6 Th17 were adoptively transferred to sex-matched NOD.Scid. Three males rapidly attained  
4 ethical endpoints (M<sup>rapid</sup>). Three females (F<sup>early</sup>) were sacrificed alongside them. The remainder of males (M<sup>d70</sup>,  
5 n=5) and females (F<sup>d70</sup>, n=3) were sacrificed at d70. **A,** representative M<sup>rapid</sup> and F<sup>early</sup> disease courses. **B,**  
6 representative M<sup>d70</sup> and F<sup>d70</sup> disease courses. **C, D, E.** cDNA were generated from splenic CD4<sup>+</sup> T cells and

1 were assessed by qPCR for expression of pre-Th1-like (C), Th17/Th1-like (D) and Th1-like memory (E)  
2 transcripts. \*,  $p < 0.05$ ; \*\*,  $p < 0.01$ , \*\*\*,  $p < 0.001$ , \*\*\*\*,  $p < 0.0001$ , Tukey's multiple comparisons test after two-  
3 way ANOVA. Data represent triplicate values from pooled samples for each condition. Error bars, s.e.m. F.  
4 Male recipients of male Th17 mice were treated daily for 8 days with inflammasome inhibitor VX-765 (n=6) or  
5 DMSO vehicle (n=8) upon attaining score 2. Linear regression analysis of disease curves post-treatment. Error  
6 lines represent 95% confidence intervals.

7

8 **Figure 6. Male sex chromosomal complement aggravates NOD-EAE and a putative X-linked Th17**  
9 **repressor, *Jarid1c*, is downregulated in highly pathogenic male Th17.** A. Th17 were generated from  
0 castrated male ( $M^{cast}$ ) or sham-operated ( $M^{sham}$ ) 1C6 mice, and were adoptively transferred to male NOD.*Scid*  
1 recipients that were monitored for signs of disease.  $M^{cast}$ , n=4;  $M^{sham}$ , n=4. B. Th17 were generated from  
2 ovariectomized female ( $F^{ovx}$ ) or sham-operated ( $F^{sham}$ ) 1C6 mice, and were adoptively transferred to female  
3 NOD.*Scid* recipients that were monitored for signs of disease.  $F^{ovx}$ , n=4;  $F^{sham}$ , n=4. C. Tg-*Sry* XX (n=5) and  
4 Tg-*Sry* XY<sup>*Sry*KO</sup> (n=6) were actively immunized with MOG<sub>[35-55]</sub> and were monitored for signs of EAE. \*,  
5  $p < 0.05$ , Mann-Whitney *U* test. D. Co-expression of IL-17 and IFN $\gamma$  in CNS-infiltrating CD4<sup>+</sup> from Tg-*Sry* XX  
6 or Tg-*Sry* XY<sup>*Sry*KO</sup> (C) at experimental endpoint. E. Th17 were generated from F1 Tg-*Sry* XX x 1C6 and Tg-*Sry*  
7 XY<sup>*Sry*KO</sup> x 1C6 and were transferred ( $2 \times 10^6$ ) to male NOD.*Scid* that were monitored for signs of disease. Th17  
8 Tg-*Sry* XX, n=6; Th17 Tg-*Sry* XY<sup>*Sry*KO</sup>, n=7.

9

0 **Figure 7. The putative X-linked Th17 repressor *Jarid1c* is downregulated in highly pathogenic male Th17**  
1 **and in CD4<sup>+</sup> T cells of men living with MS.** A. Schematic of the bioinformatics approach used to identify  
2 potential repressors of pathogenic Th17 that are expressed on the X chromosome and that escape second-copy  
3 silencing. *Jarid1c* (downregulated 3.2-fold in CNS-infiltrating Th17), *Utp14a* (7.7 fold) and *Pbdc1* (2.43-fold)  
4 were identified. B. Expression of putative regulators *Jarid1c*, *Utp14a* and *Pbdc1* were assessed from CNS-  
5 infiltrating CD4<sup>+</sup> from F<sup>early</sup> versus M<sup>rapid</sup> or from F<sup>d70</sup> versus M<sup>d70</sup> by qPCR. \*,  $p < 0.05$ ; \*\*,  $p < 0.01$ ; t-test. Data  
6 represent triplicate values from pooled samples (F<sup>early</sup>, n=3; M<sup>rapid</sup>, n=3; F<sup>d70</sup>, n=3; M<sup>d70</sup>, n=5). Error bars s.e.m.

1 C. CD4<sup>+</sup>CD3<sup>+</sup> T cells were purified from peripheral blood mononuclear cells taken from age-matched men  
2 (n=12, 51.4 ± 1.5a) and women (n=14, 52.6 ± 2.2) living with MS. Expression of *Jarid1c*, *Utp14a* and *Pbdc1*  
3 were assessed by qPCR. \*, p<0.05, t-test. Each symbol represents an individual.

4  
5 **Supplemental Figure 1.** Female recipients of female Th17 or male recipients of male Th17 were sacrificed at  
6 disease onset (F, n=4; M, n=4) and relapse (F, n=4, M, n=3). Production of GM-CSF, TNF $\alpha$  and IL-2 were  
7 assessed from splenic (A) or CNS-infiltrating (B) CD4<sup>+</sup> T cells. \*\*, p<0.01, t-test. Gated on live CD4<sup>+</sup> events.  
8 C. FoxP3<sup>+</sup> CD4<sup>+</sup> T cells were assessed from the spleens of female vs. male recipients at onset. Gated on live  
9 CD4<sup>+</sup> events.

0  
1 **Supplemental Figure 2.** Female recipients of female Th17 or male recipients of male Th17 were sacrificed at  
2 disease onset and expression of pre-Th1-like, Th17/Th1-like and Th1-like memory transcripts was assessed  
3 from splenic CD4<sup>+</sup> T cells by qPCR. Data pooled from 3 female and 3 male mice. *t*-test was applied.

4  
5 **Supplemental Table 1. X chromosome transcripts that are downregulated by 2-fold or greater in**  
6 **pathogenic versus non-pathogenic Th17.** RNA-seq data from CNS-infiltrating (pathogenic) versus LN (non-  
7 pathogenic) Th17 cells(Gaublomme et al., 2015) were analyzed to identify transcripts on the X chromosome  
8 that were downregulated by 2-fold or greater in pathogenic cells. Data presented by ascending order of  
9 expression in pathogenic cells. Transcripts of interest in this study (*Utp14a*, *Kdm5c*, *Pbdc1*) that escape X-  
0 linked silencing in spleen (Berletch et al., 2015) are bolded and italicized in the list. *Kdm5c* is the gene name of  
1 *Jarid1c*.

2  
3 **Supplemental Table 2. Characteristics of MS patients analyzed.** M, male; F, female. RR,  
4 relapsing/remitting; SP, secondary progressive; PP, primary progressive.

5  
6

1  
2  
3  
4  
5  
6  
7  
8  
9  
0 **Table 1**

| <i>Group #</i> | <i>Group</i>                     | <i>Incidence</i> | <i>Onset (days)</i> | <i>Mean maximal score</i>   | <i>Number of relapses</i>    | <i>Rapid course</i>  | <i>Chronic progressive</i> | <i>Relapse only</i> | <i>Relapse/Chronic</i> |
|----------------|----------------------------------|------------------|---------------------|-----------------------------|------------------------------|----------------------|----------------------------|---------------------|------------------------|
| 1              | F (all)<br>Th17                  | 30/30            | 12.4 ±<br>0.6       | 2.6 ±<br>0.2 <sup>a,b</sup> | 1.2 ± 0.2 <sup>e,f</sup>     | 0/30 <sup>h,i</sup>  | 10/30 <sup>l,m</sup>       | 13/30               | 10/30                  |
| 2              | M (all)<br>Th17                  | 33/33            | 11.7 ±<br>0.6       | 4.3 ±<br>0.5 <sup>a,d</sup> | 0.96 ± 0.2                   | 23/33 <sup>h,k</sup> | 25/33 <sup>l</sup>         | 11/33               | 9/33                   |
| 2a             | <i>M<sup>rapid</sup></i><br>Th17 | 23/23            | 12.3 ±<br>0.8       | 5 ± 0 <sup>b,c</sup>        | 0.52 ±<br>0.1 <sup>e,g</sup> | 23/23 <sup>i,j</sup> | 20/23 <sup>m</sup>         | 6/23                | 4/23                   |
| 2b             | <i>M<sup>d70</sup></i><br>Th17   | 10/10            | 10.7 ±<br>0.4       | 2.9 ±<br>0.1 <sup>c</sup>   | 2 ± 0.2 <sup>f,g</sup>       | 0/10 <sup>j</sup>    | 5/10                       | 5/10                | 5/10                   |
| 3              | F Th1                            | 14/14            | 15.6±<br>2.0        | 2.4 ± 0.9                   | 1.9 ± 0.3                    | 0/14                 | 1/14 <sup>n</sup>          | 12/14 <sup>o</sup>  | 1/14 <sup>p</sup>      |
| 4              | M Th1                            | 13/13            | 12.8±<br>1.3        | 3.3 ±<br>0.2 <sup>d</sup>   | 1.7 ± 0.3                    | 2/13 <sup>k</sup>    | 9/13 <sup>n</sup>          | 4/13 <sup>o</sup>   | 7/13 <sup>p</sup>      |

1

2 **Table 1. Clinical features of recipients of female or male 1C6 effector CD4<sup>+</sup> T cells.** All mice presented here  
3 were followed to experimental endpoints. The following groups were compared: 1:2, 1:2a:2b, 3:4, 2:4. <sup>a</sup>  
4  $p < 0.0001$ ; <sup>b</sup>  $p < 0.0001$ , <sup>c</sup>  $p = 0.0094$ ; <sup>d</sup>  $p = 0.021$ ; <sup>e</sup>  $p = 0.0194$ ; <sup>f</sup>  $p = 0.0331$ ; <sup>g</sup>  $p < 0.0001$ ; <sup>h</sup>  $p < 0.0001$ ; <sup>i</sup>  $p < 0.0001$ ; <sup>j</sup>  
5  $p < 0.0001$ ; <sup>k</sup>  $p = 0.0012$ ; <sup>l</sup>  $p = 0.001$ ; <sup>m</sup>  $p < 0.0001$ ; <sup>n</sup>  $p = 0.0013$ ; <sup>o</sup>  $p = 0.0063$ ; <sup>p</sup>  $p = 0.0128$ . All other comparisons were  
6 not significant. Onset and number of relapses were assessed by *t*-test for pairwise comparisons or by Tukey's  
7 multiple comparisons test after one-way ANOVA (1:2a:2b). Mean maximal score was assessed by Mann-  
8 Whitney *U* test, or by Dunn's multiple comparisons test after one-way ANOVA (1:2a:2b). Incidence of overall  
9 disease, chronic progression, relapse-only, and relapse/chronic were assessed with Fisher's exact test, with  
0 Bonferroni's correction applied to 1:2a:2b.

1

# Figure 1

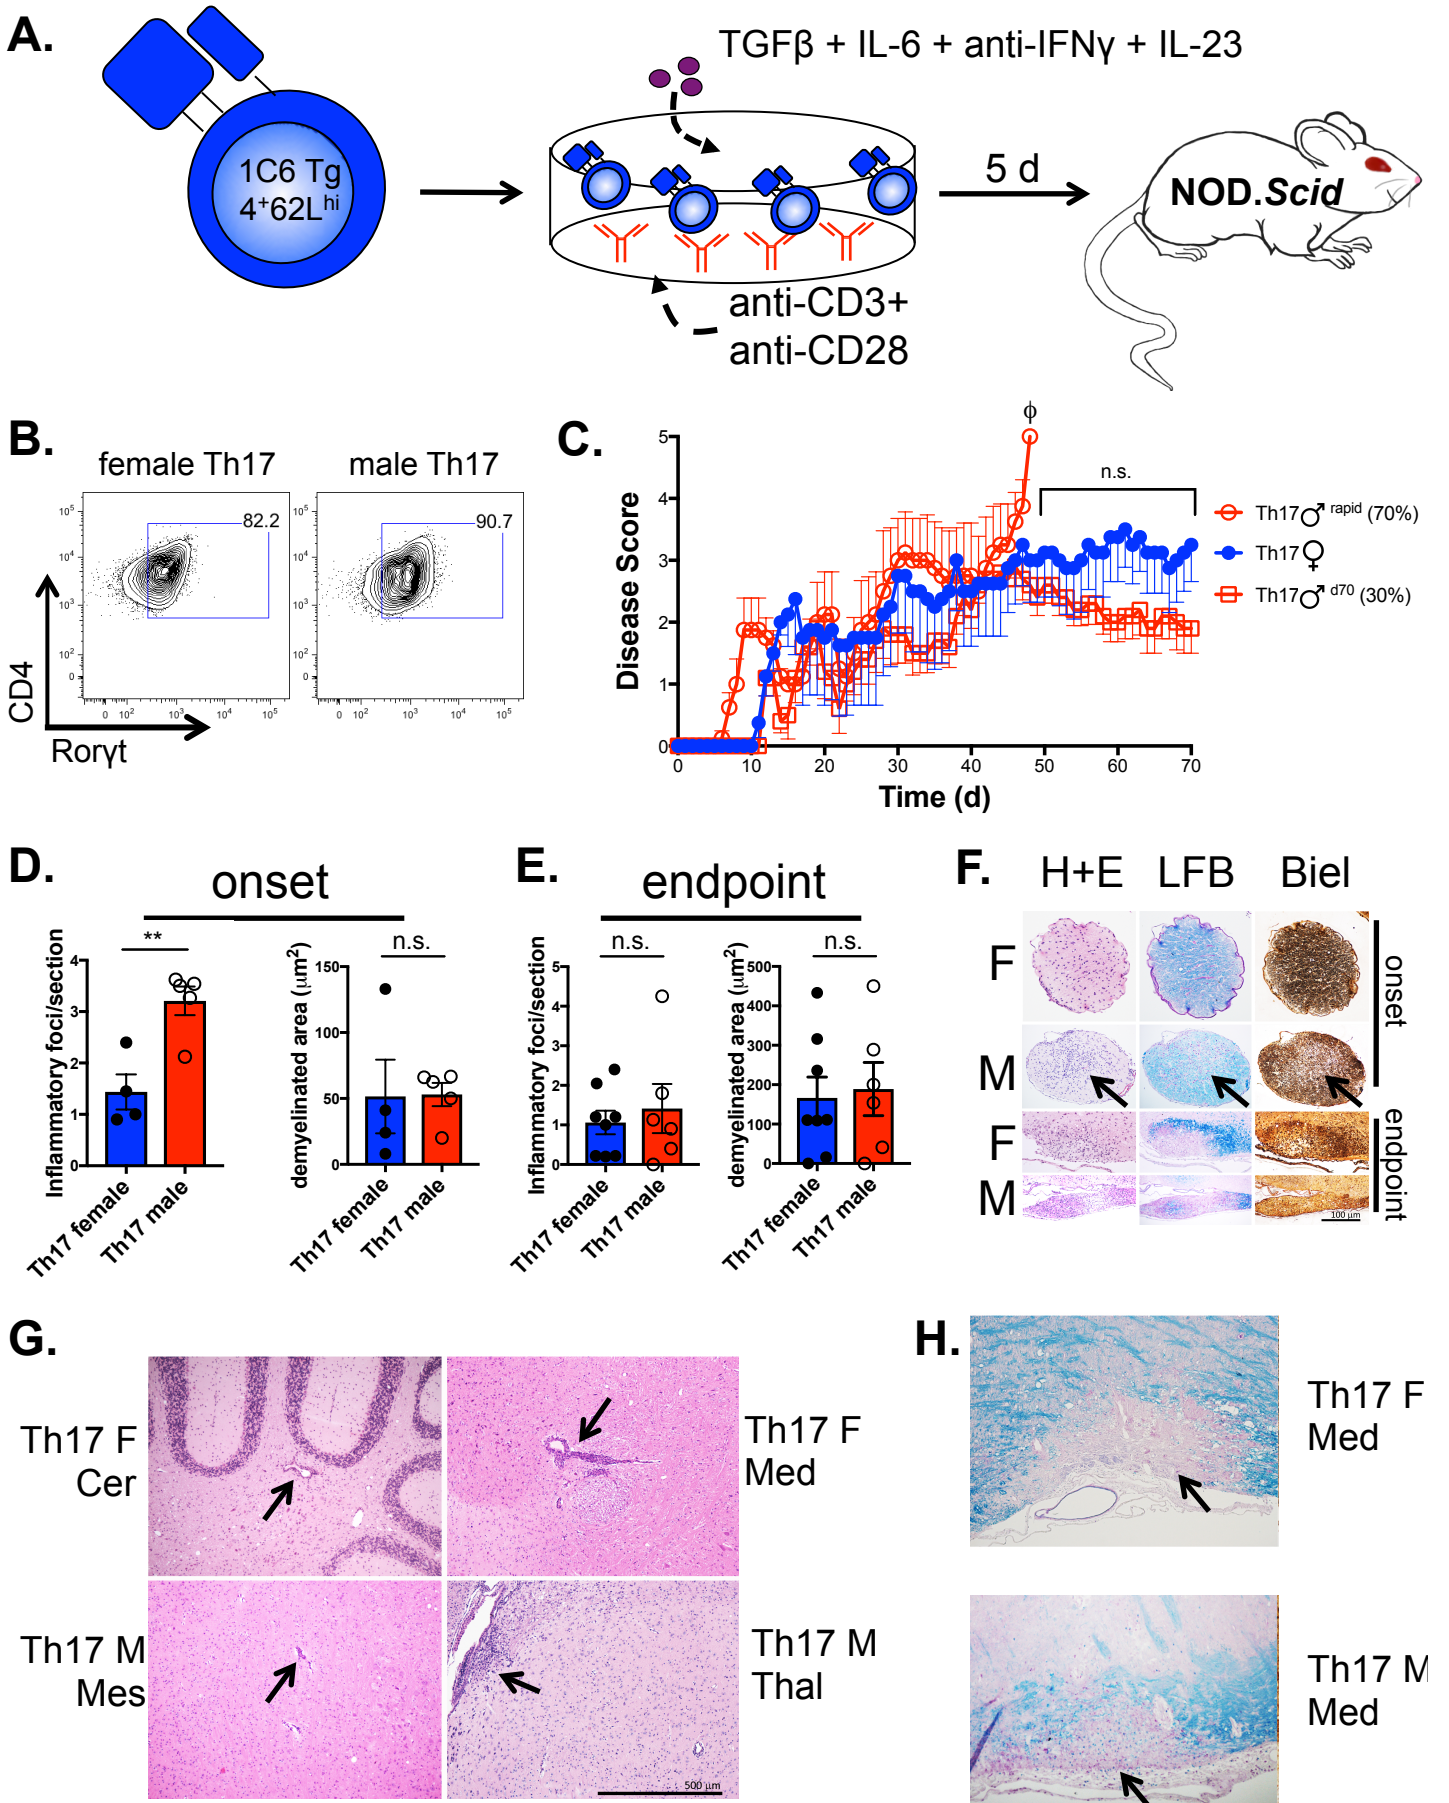



# Figure 2

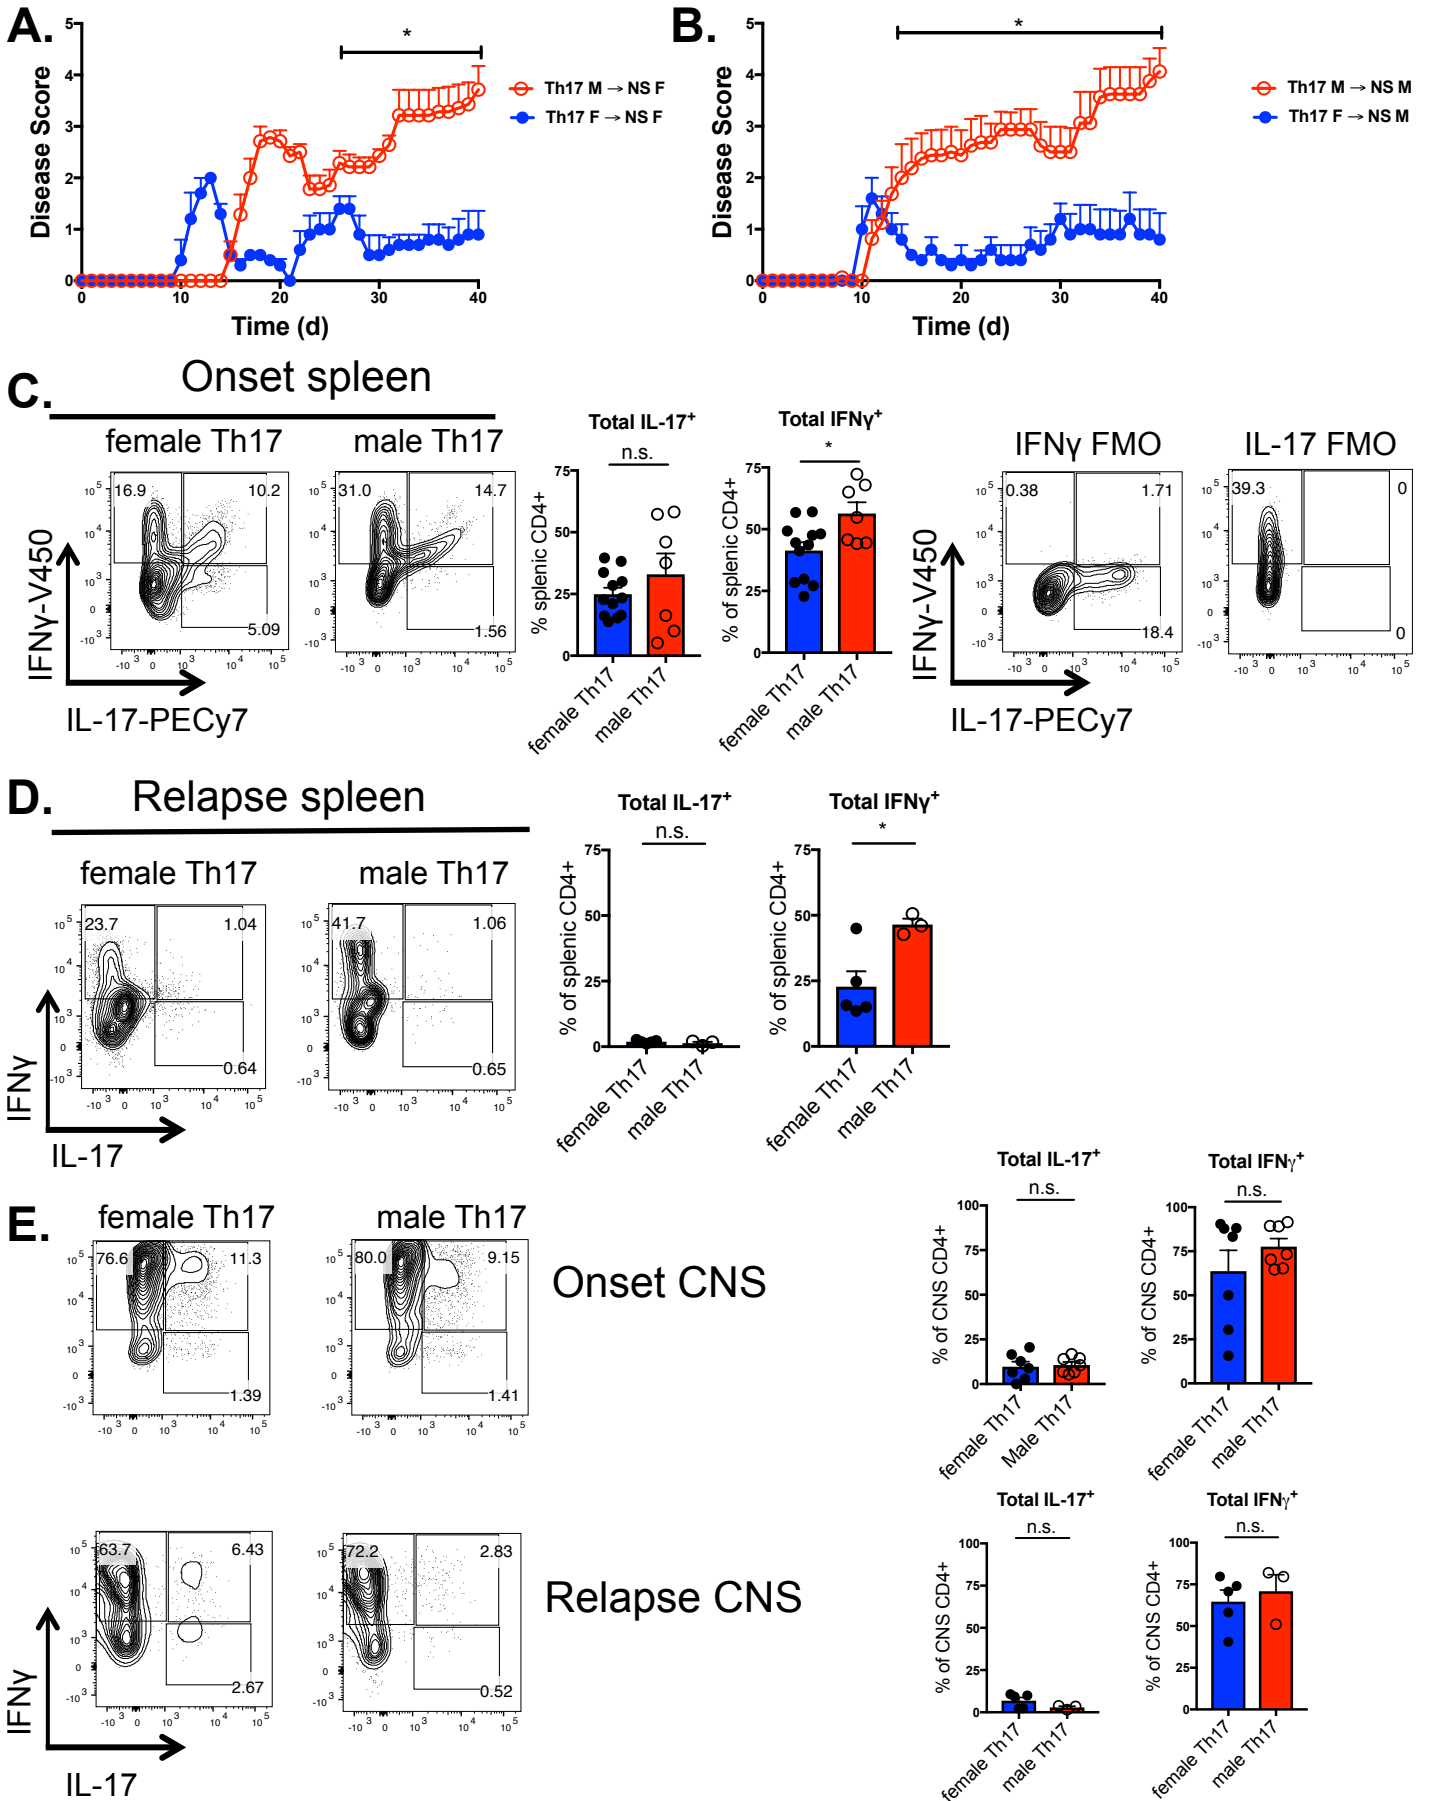



# Figure 3

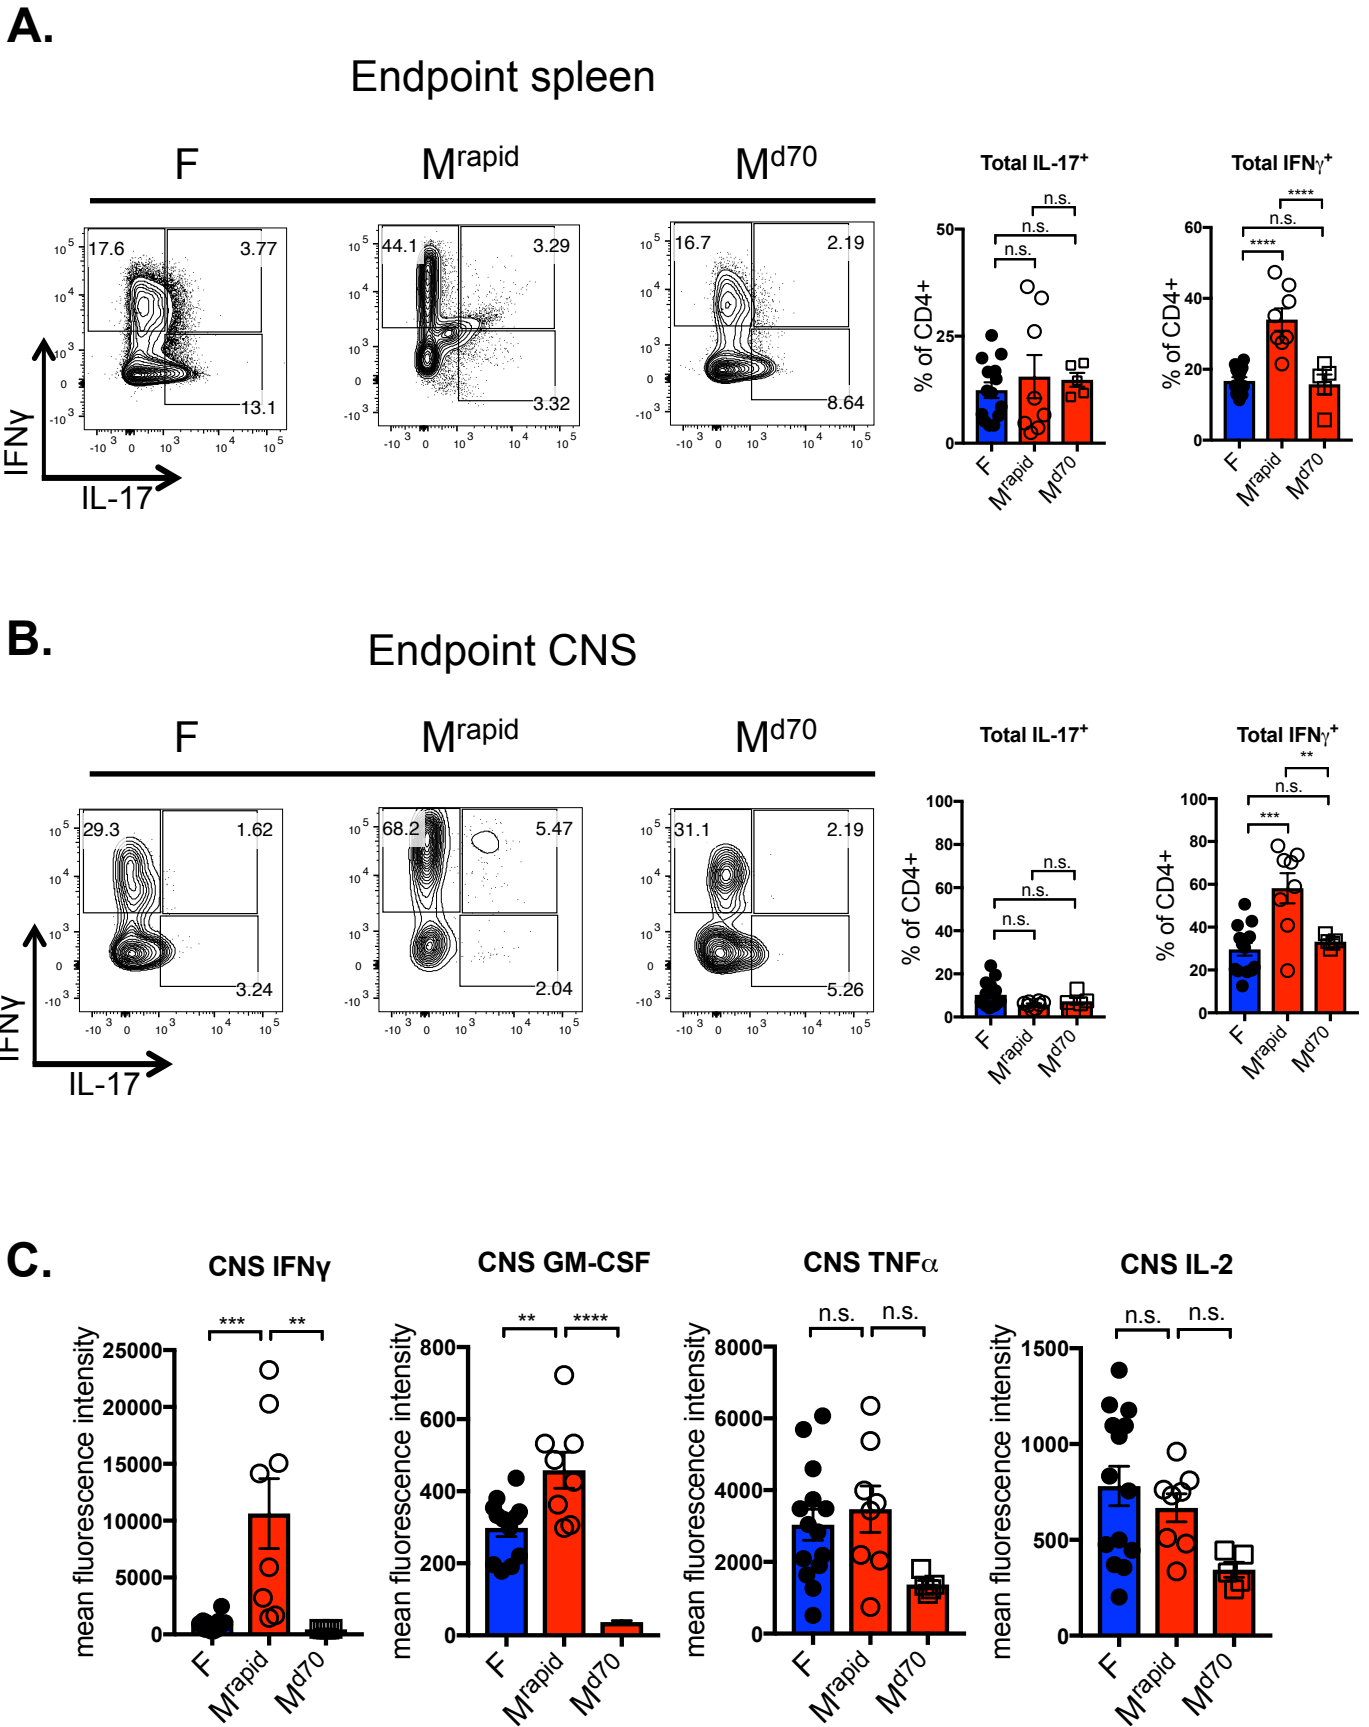

# Figure 4

A.

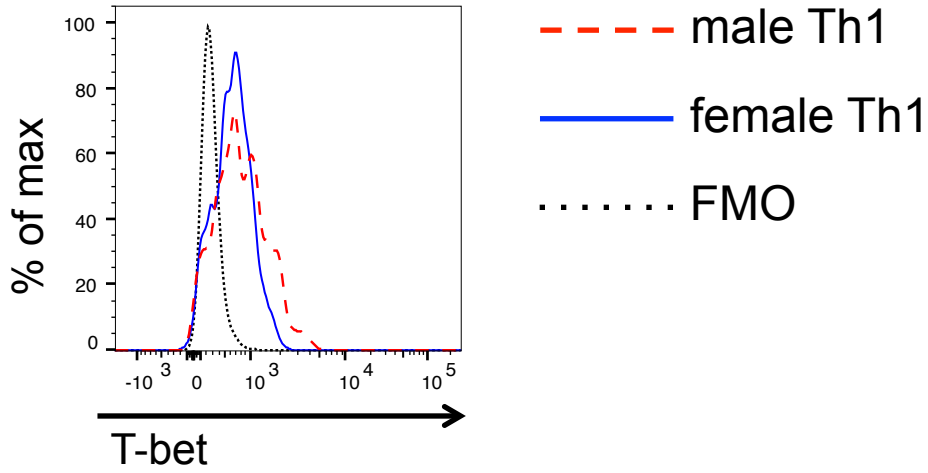

B.

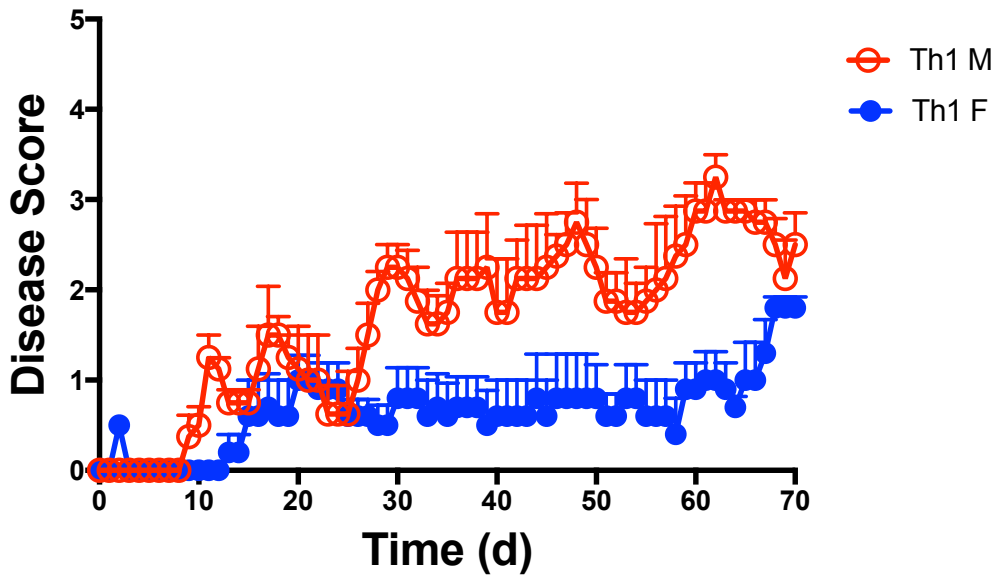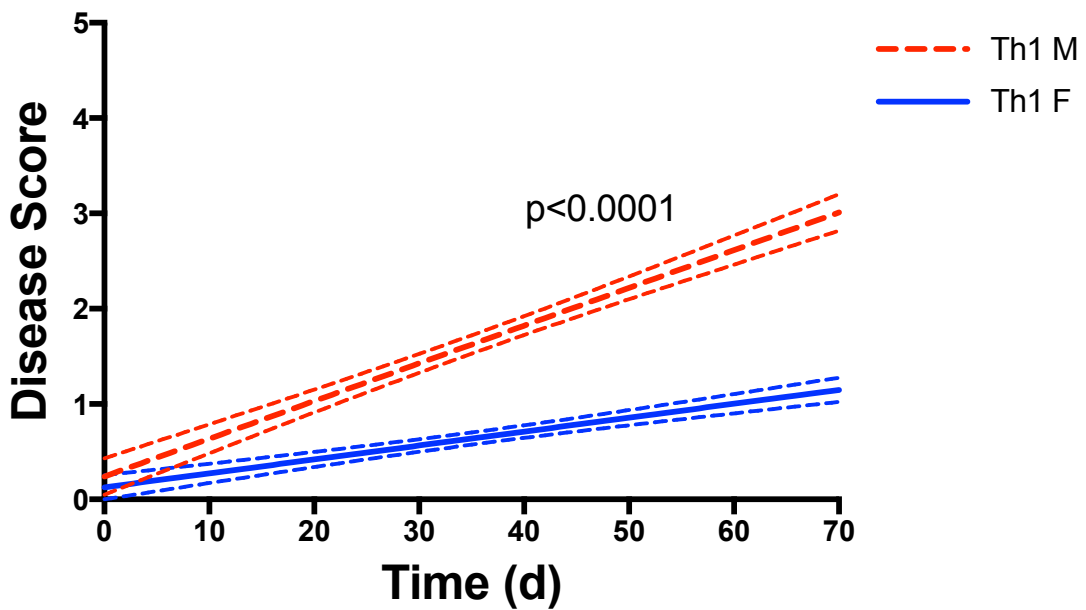

# Figure 5

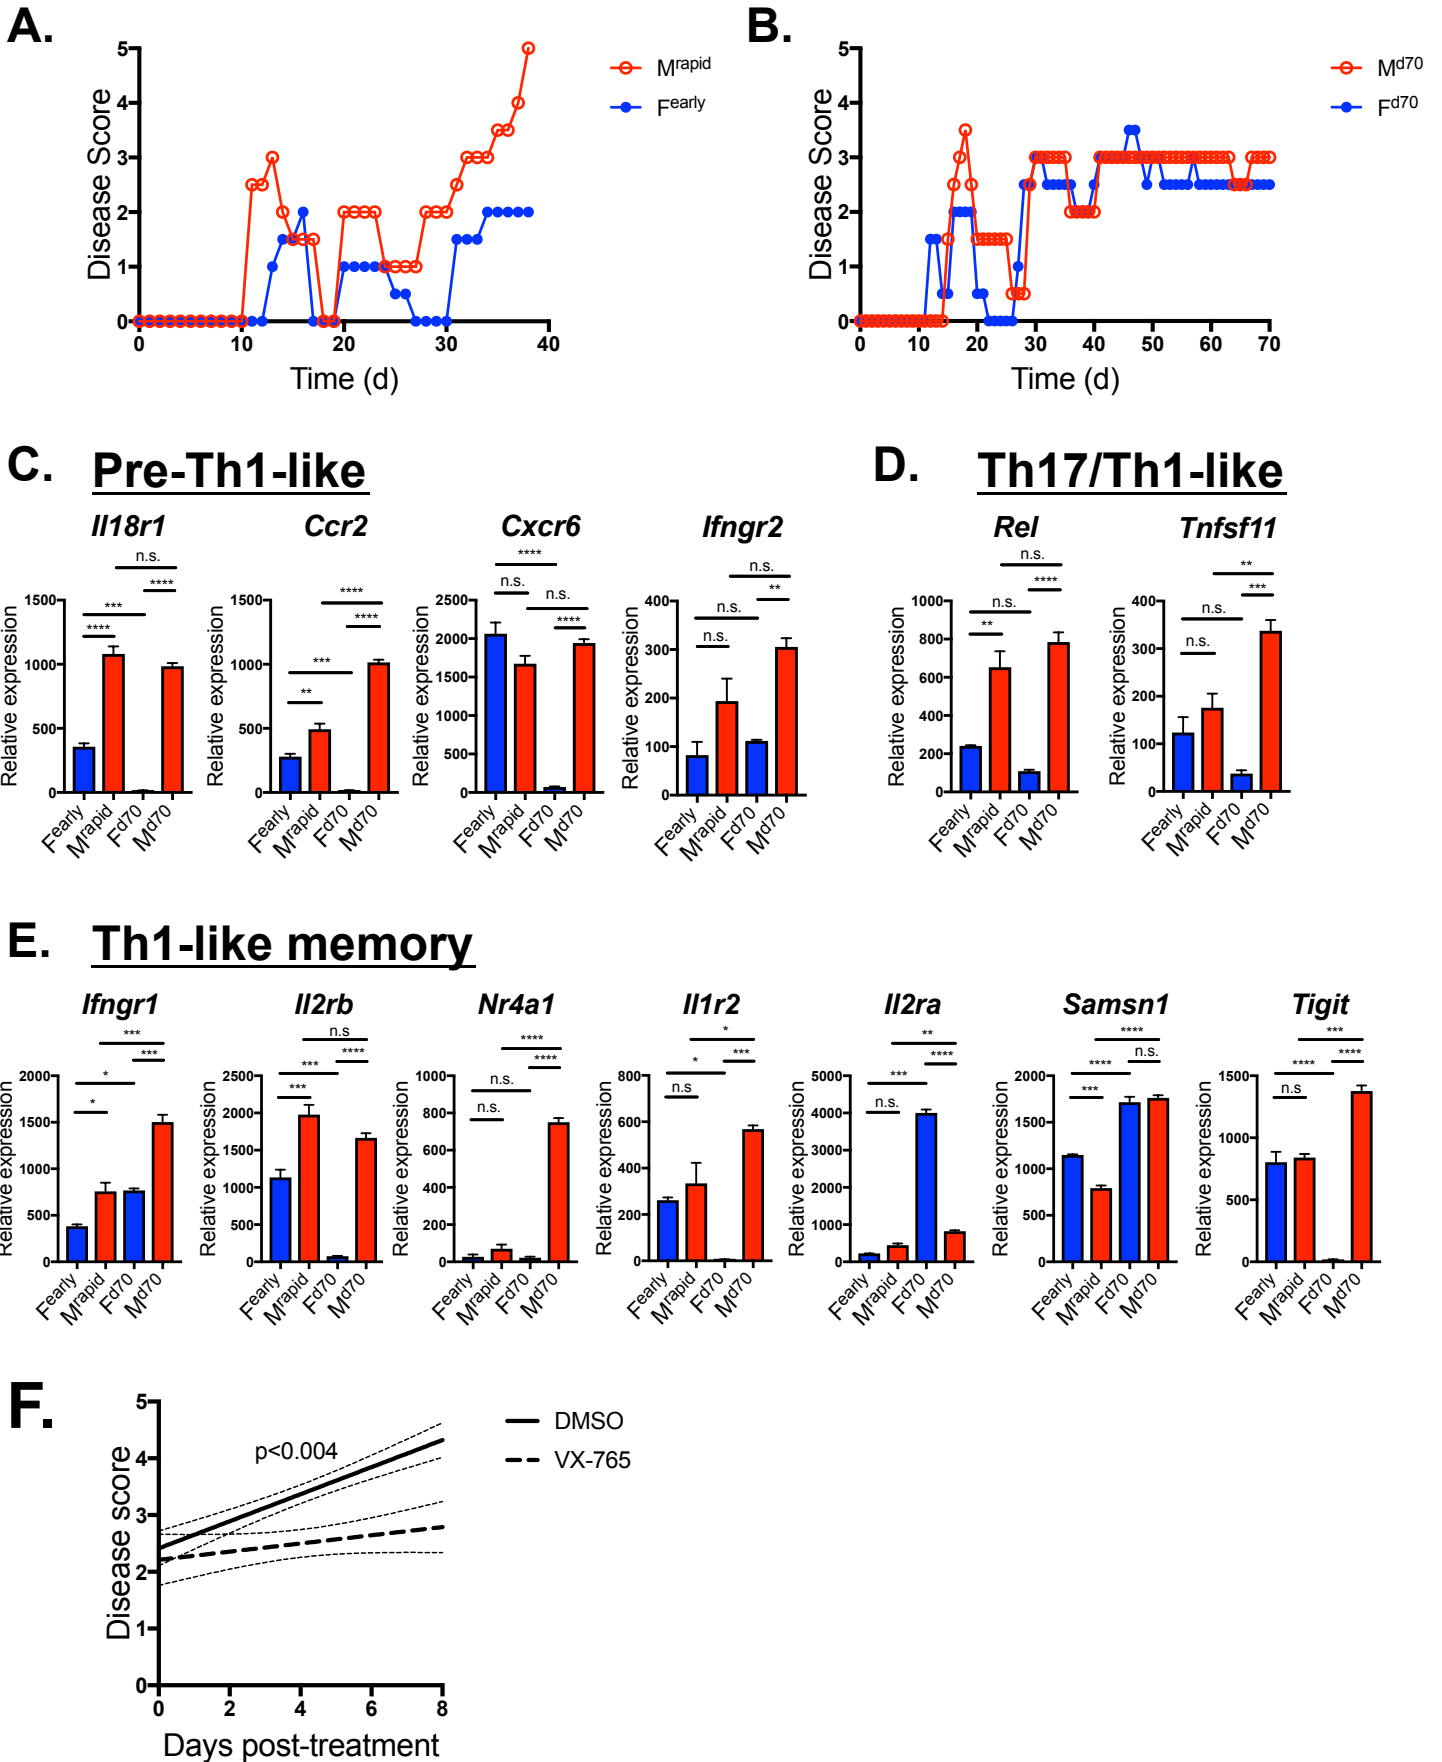

# Figure 6

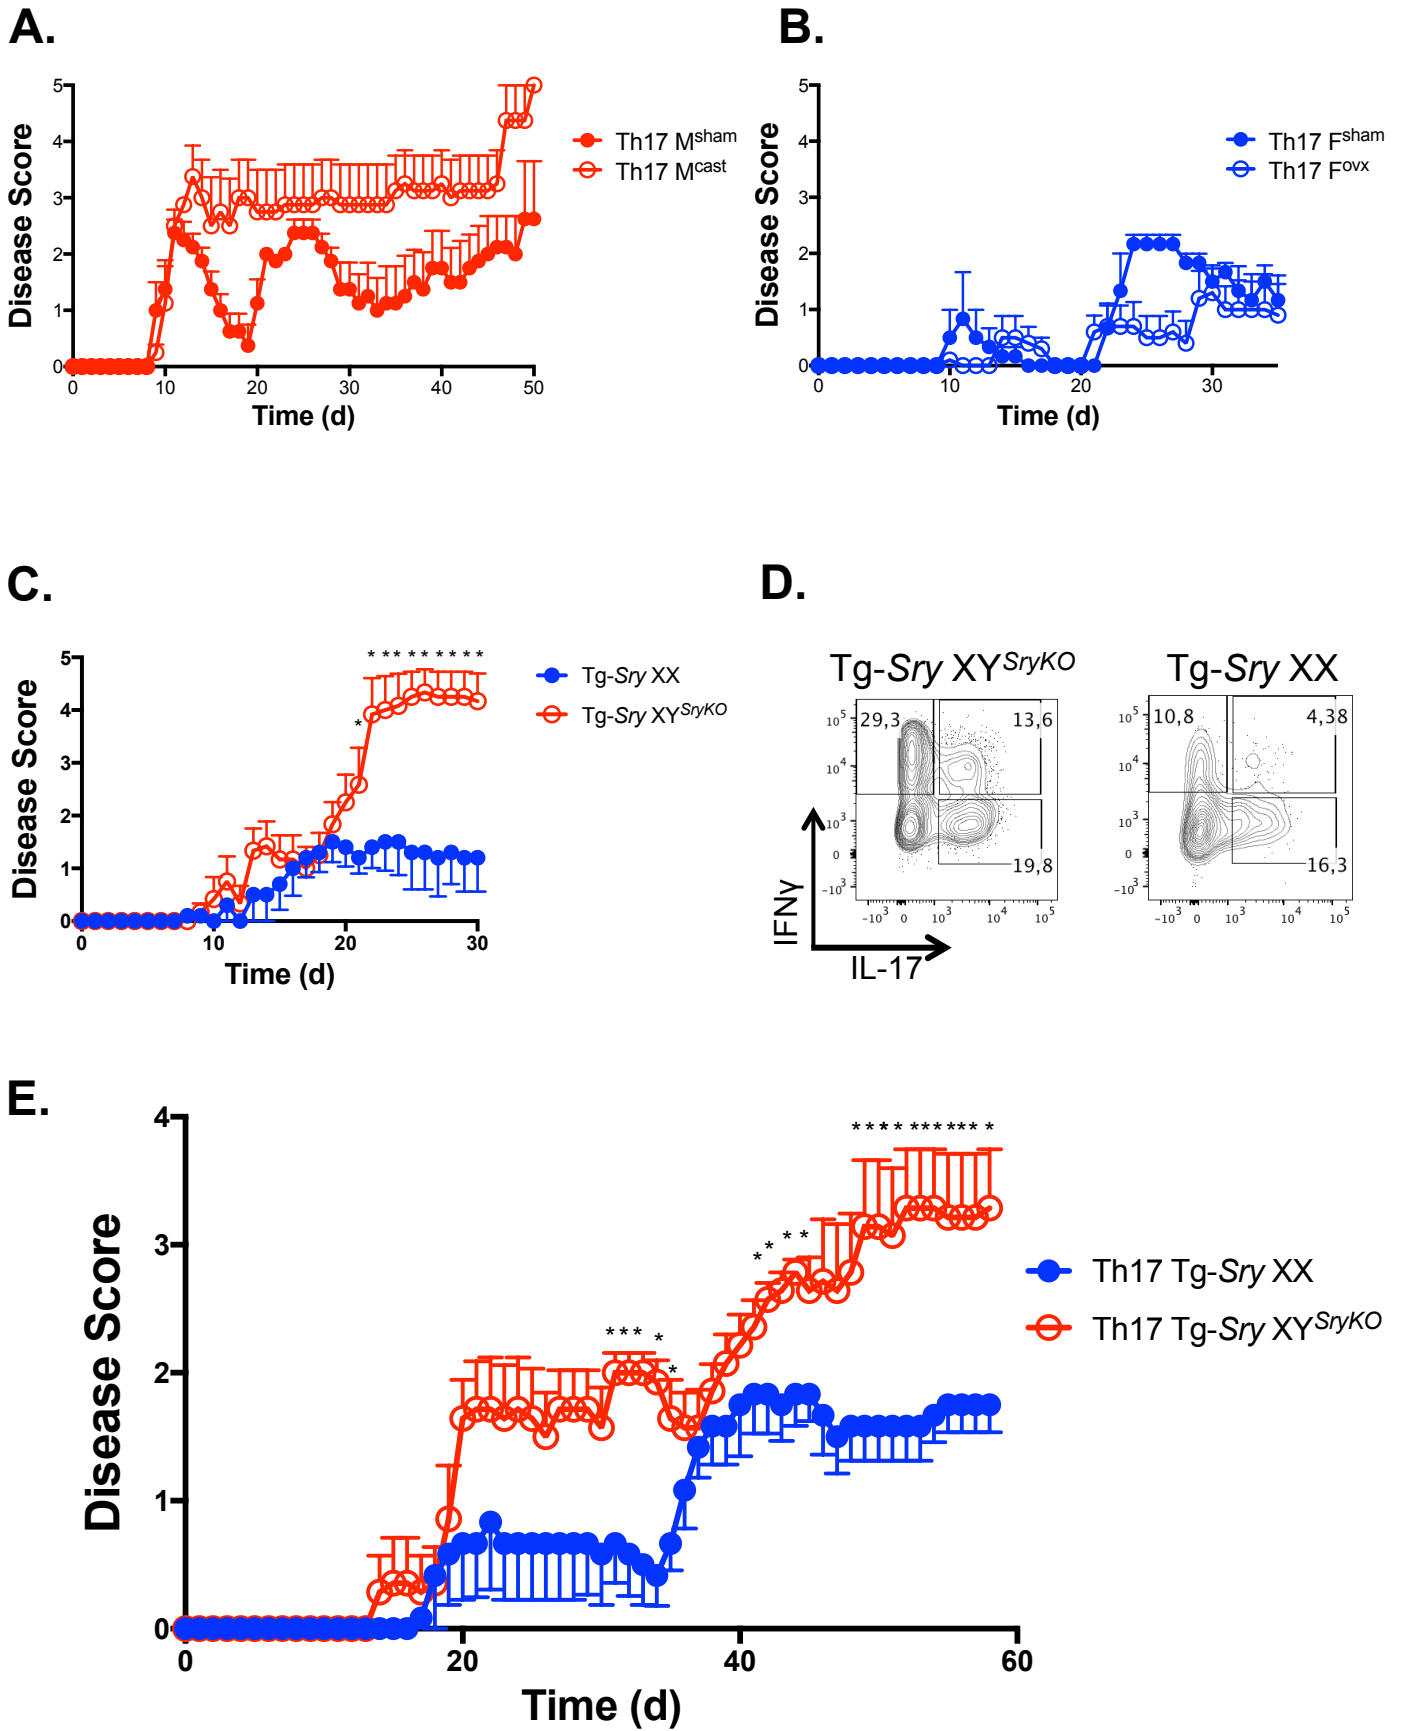

# Figure 7

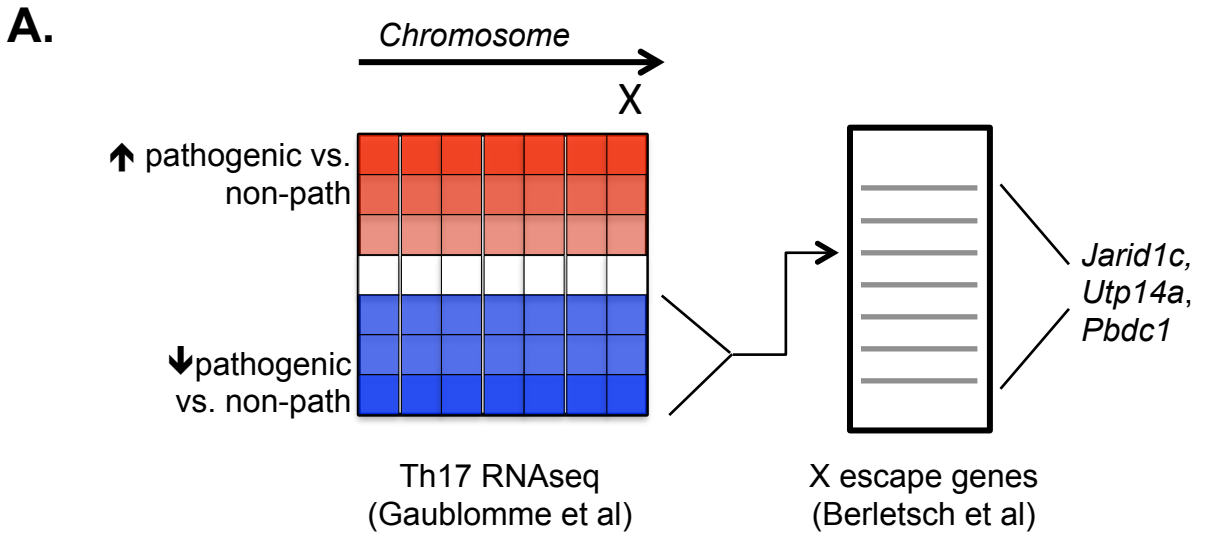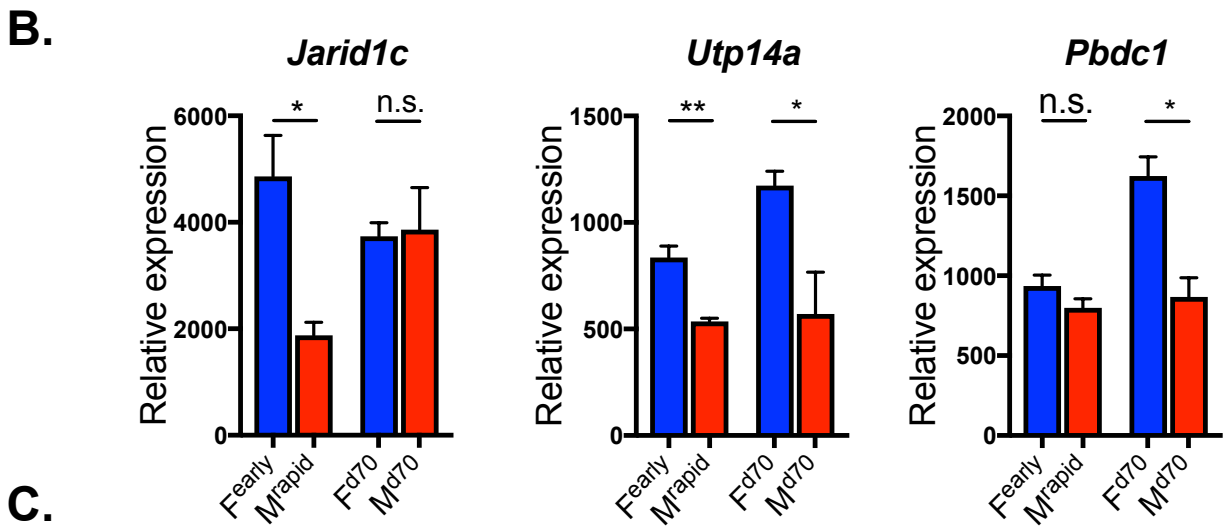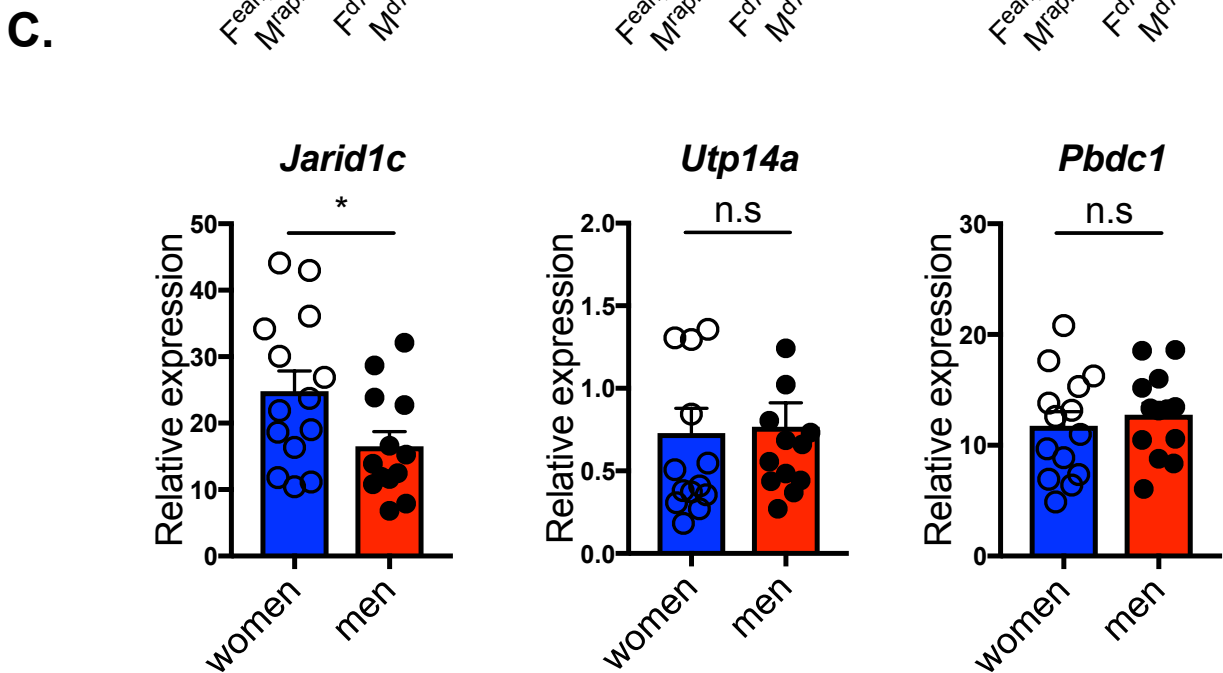

# Supplementary Figure 1

**A.**

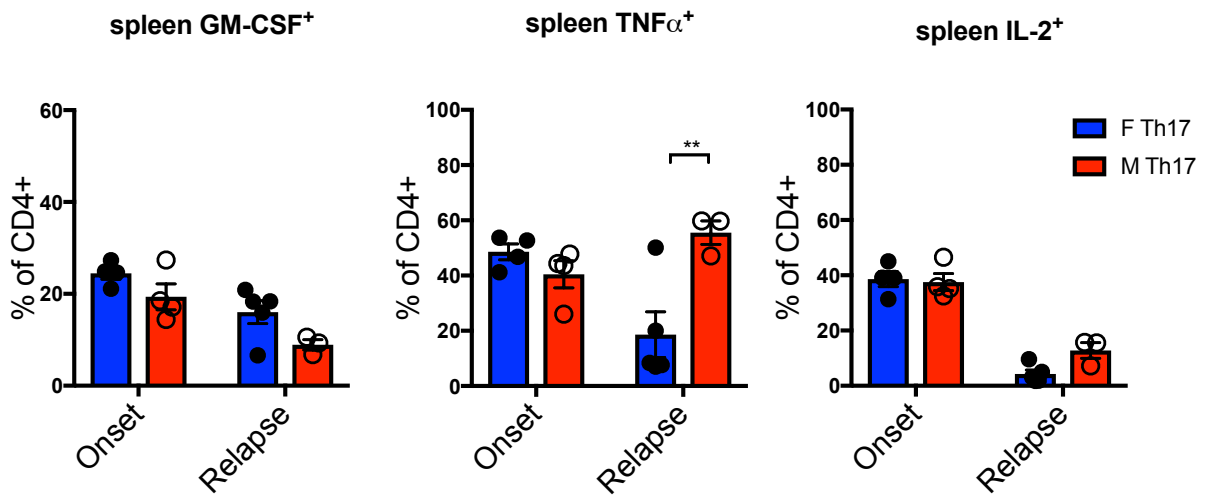

**B.**

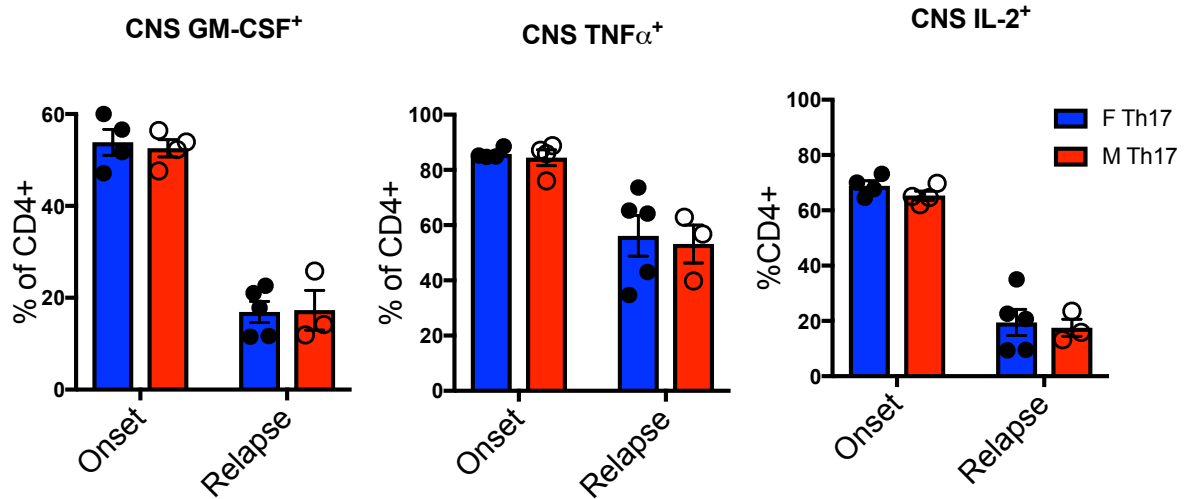

**C.**

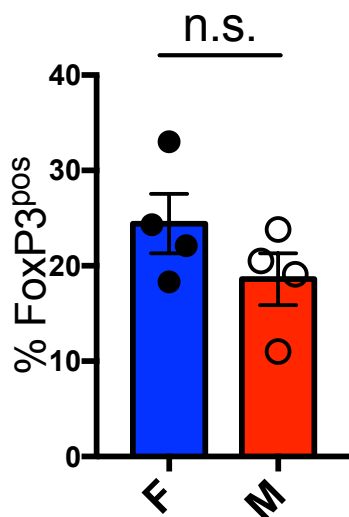

# Supplementary Figure 2

## Pre-Th1

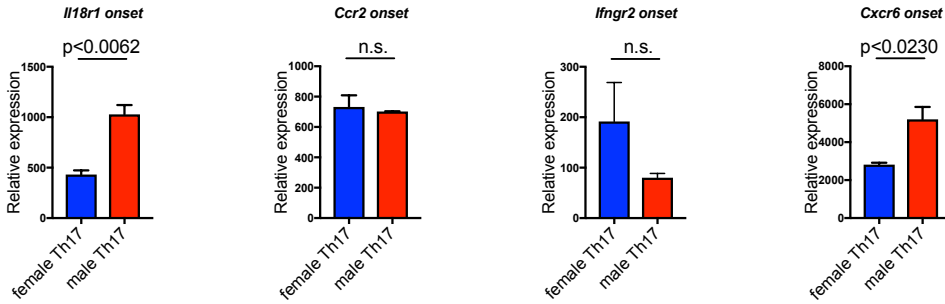

## Th17/Th1-like

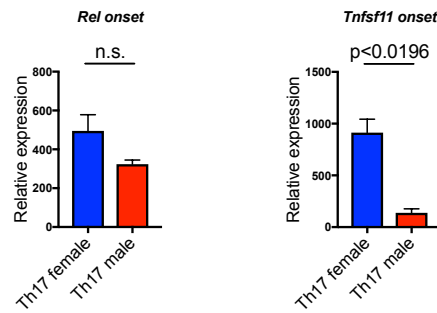

## Th1-like memory

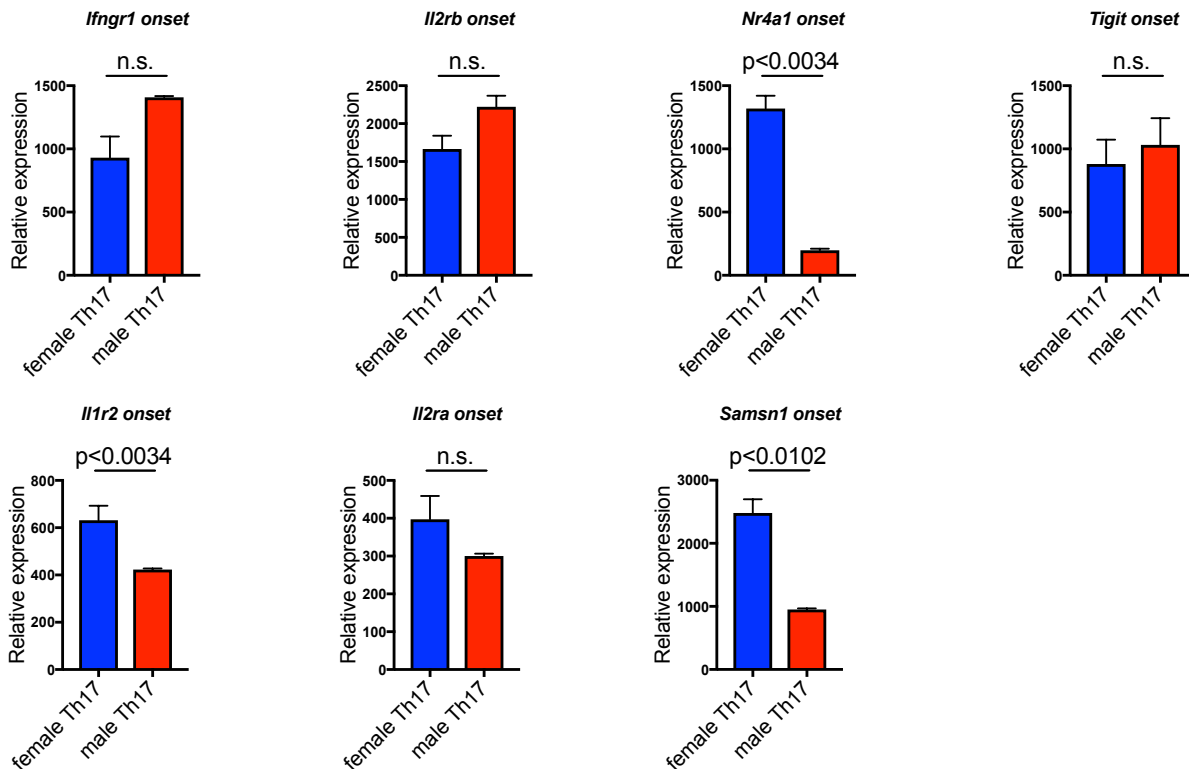

Source: https://www.biorxiv.org/content/10.1101/640904v2.full.pdf
